1  
2  
3  
4  
5  
6 **Central oxytocin signaling inhibits food reward-motivated behaviors and**  
7 **VTA dopamine responses to food-predictive cues**  
8  
9

10  
11 Clarissa M. Liu<sup>a,b</sup>, Ted M. Hsu<sup>c</sup>, Andrea N. Suarez<sup>b</sup>, Keshav S. Subramanian<sup>a,b</sup>, Ryan A.  
12 Fatemi<sup>b</sup>, Alyssa M. Cortella<sup>b</sup>, Emily E. Noble<sup>d</sup>, Mitchell F. Roitman<sup>c</sup>, and Scott E.  
13 Kanoski<sup>a,b</sup> \*  
14  
15  
16

17 <sup>a</sup>*Neuroscience Graduate Program, University of Southern California, Los Angeles, CA,*  
18 *United States*

19 <sup>b</sup>*Department of Biological Sciences, Human and Evolutionary Biology Section,*  
20 *University of Southern California, 3616 Trousdale Parkway, AHF 252, Los Angeles, CA*  
21 *90089, United States*

22 <sup>c</sup>*Department of Psychology, University of Illinois at Chicago, 1007 W. Harrison St.,*  
23 *Chicago, IL 60607-7137, United States*

24 <sup>d</sup>*Department of Foods and Nutrition, University of Georgia, 129 Barrow Hall, Athens*  
25 *GA 30602, United States*  
26  
27  
28  
29  
30  
31  
32  
33  
34  
35  
36  
37  
38  
39  
40  
41  
42

43 \*Corresponding author at: University of Southern California, Los Angeles, CA, United  
44 States.  
45

46 E-mail address: [kanoski@usc.edu](mailto:kanoski@usc.edu) (S.E. Kanoski).  
47  
48  
49  
50  
51  
52

53 *Keywords (10 max):* obesity, impulsivity, incentive, motivation, reward, memory,  
54 photometry  
55  
56  
57  
58  
59  
60  
61  
62  
63  
64  
65

1  
2  
3  
4 **ABSTRACT**

5  
6 Oxytocin potently reduces food intake and is a potential target system for obesity  
7  
8 treatment. A better understanding of the behavioral and neurobiological mechanisms  
9  
10 mediating oxytocin's anorexigenic effects may guide more effective obesity  
11  
12 pharmacotherapy development. The present study examined the effects of central  
13  
14 (lateral intracerebroventricular [ICV]) administration of oxytocin in rats on motivated  
15  
16 responding for palatable food. Various conditioning procedures were employed to  
17  
18 measure distinct appetitive behavioral domains, including food seeking in the absence  
19  
20 of consumption (conditioned place preference expression), impulsive responding for  
21  
22 food (differential reinforcement of low rates of responding), effort-based appetitive  
23  
24 decision making (high-effort palatable vs. low-effort bland food), and postingestive  
25  
26 reward value encoding (incentive learning). Results reveal that ICV oxytocin potently  
27  
28 suppresses food-seeking behavior, impulsivity, and effort-based palatable food choice,  
29  
30 yet does not influence postingestive reward value encoding in the incentive learning  
31  
32 task. To investigate a potential neurobiological mechanism mediating these behavioral  
33  
34 outcomes, we utilized in vivo fiber photometry in ventral tegmental area (VTA)  
35  
36 dopamine neurons to examine oxytocin's effect on phasic dopamine neuron responses  
37  
38 to sucrose-predictive Pavlovian cues. Results reveal that ICV oxytocin suppressed food  
39  
40 cue-evoked dopamine neuron activity and increased latency to consume the sucrose  
41  
42 reinforcement. Collectively, these data reveal that central oxytocin signaling inhibits  
43  
44 various obesity-relevant conditioned appetitive behaviors, potentially via reductions in  
45  
46 food cue-driven phasic dopamine neural responses in the VTA.  
47  
48  
49  
50  
51  
52  
53  
54  
55  
56  
57  
58  
59  
60  
61  
62  
63  
64  
65

1  
2  
3  
4  
5  
6  
7  
8  
9  
10  
11  
12  
13  
14  
15  
16  
17  
18  
19  
20  
21  
22  
23  
24  
25  
26  
27  
28  
29  
30  
31  
32  
33  
34  
35  
36  
37  
38  
39  
40  
41  
42  
43  
44  
45  
46  
47  
48  
49  
50  
51  
52  
53  
54  
55  
56  
57  
58  
59  
60  
61  
62  
63  
64  
65

## Highlights

- Central oxytocin inhibits motivated responding for palatable food reinforcement
- Central oxytocin does not play role in regulating postingestive reward value encoding
- Central oxytocin blunts VTA dopamine neuron activity in response to food cues

## Introduction

There is recent interest in targeting the oxytocin system for obesity pharmacotherapy development based on preclinical findings revealing that oxytocin administration reduces caloric intake, increases fat oxidation, and improves insulin sensitivity (Blevins and Ho, 2013; Lawson, 2017; Olszewski et al., 2017; Sabatier et al., 2013). Oxytocin, synthesized centrally in the paraventricular hypothalamic nucleus (PVH) and supraoptic nucleus (SON), reduces food intake through signaling in classic brain feeding centers, including the arcuate nucleus of the hypothalamus (Caquineau et al., 2006; Fenselau et al., 2017; Maejima et al., 2009; Yosten and Samson, 2010), the ventromedial nucleus of the hypothalamus (Noble et al., 2014), and the hindbrain nucleus tractus solitarius, where oxytocin interacts with other feeding-relevant peptides (i.e. neuropeptide Y, alpha-melanocyte-stimulating hormone, glucagon-like peptide-1 and cholecystikinin) (Affleck et al., 2012; Atasoy et al., 2012; Blevins et al., 2003; Katsurada et al., 2014; Larsen et al., 1997; Motojima et al., 2016; Ong et al., 2015; Ong et al., 2017; Rinaman and Rothe, 2002).

These hypothalamic and hindbrain substrates associated with oxytocin's feeding effects are thought to predominantly regulate food intake that is driven by energetic need (Liu and Kanoski, 2018). However, feeding is a complex behavior that requires integration of interoceptive and external environmental cues to coordinate food-directed actions, and therefore must also engage "higher-order" substrates that regulate various cognitive processes. Specifically, learned food-predictive cues provide information about properties of impending food, signal affective or incentive properties, and elicit skeletal and autonomic responses to guide complex food-directed behavior (Johnson, 2013). While learning about the food environment is necessary for survival,



1  
2  
3  
4 cues associated with palatable food can also stimulate overeating beyond energetic need  
5  
6 and contribute to obesity (Ferrario et al., 2016; Hsu et al., 2018a; Johnson, 2013;  
7  
8 Kanoski et al., 2013; Liu and Kanoski, 2018; Petrovich and Gallagher, 2007; Rossi and  
9  
10 Stuber, 2018). Whether central oxytocin signaling influences higher-order cognitive  
11  
12 aspects of feeding that are relevant to excessive caloric intake and obesity is poorly  
13  
14 understood. The present study therefore investigated whether central oxytocin signaling  
15  
16 influences a multitude of conditioned food-motivated and food cue-associated  
17  
18 behavioral tasks that probe [1] palatable food seeking behavior in the absence of  
19  
20 consumption, [2] impulsive operant responding for food reinforcement, [3] effort-based  
21  
22 decision making (choice between high-effort palatable vs. low-effort bland food), and [4]  
23  
24 postingestive reward-value encoding (“incentive learning”).  
25  
26  
27  
28  
29  
30

31  
32       Conditioned environmental cues that predict the availability of palatable food  
33  
34 activate mesolimbic dopaminergic brain reward pathways to enhance food-directed  
35  
36 action and consumption (Berridge, 2007; Hsu et al., 2018a) . Oxytocin receptors are  
37  
38 expressed in dopamine neurons in the ventral tegmental area (VTA) and these oxytocin-  
39  
40 receptor expressing VTA neurons project to the nucleus accumbens, prefrontal cortex,  
41  
42 and extended amygdala (Peris et al., 2017). Furthermore, oxytocin has been shown to  
43  
44 modulate dopaminergic tone in the VTA and can decrease excitatory synaptic  
45  
46 transmission through endocannabinoid-dependent mechanisms (Xiao et al., 2018; Xiao  
47  
48 et al., 2017). However, whether central oxytocin signaling affects food cue-associated  
49  
50 dopamine signaling in awake behaving animals is unknown. Here we explore the effects  
51  
52 of central oxytocin signaling on phasic VTA dopamine neuron responses to sucrose-  
53  
54  
55  
56  
57  
58  
59  
60  
61  
62  
63  
64  
65

1  
2  
3  
4 predictive Pavlovian cues as a potential mechanism contributing to oxytocin's  
5  
6 anorexigenic effects.  
7  
8  
9

## 10 11 **Material and Methods**

### 12 13 *Subjects*

14  
15 For experiments 1-4, male Sprague-Dawley rats (Envigo, Indianapolis, IN;  
16  
17 weighing >250 g) were individually housed in a temperature controlled (22-23°C)  
18  
19 vivarium with ad libitum access to water and chow (LabDiet 5001, Lab Diet, St. Louis,  
20  
21 MO; except where noted). Rats were maintained on a 12hr:12hr reverse light/dark cycle  
22  
23 (lights off at 1000h). All procedures were approved by the Institute of Animal Care and  
24  
25 Use Committee at the University of Southern California.  
26  
27  
28  
29

30  
31 For experiment 5, male Long Evans rats expressing Cre recombinase under the  
32  
33 control of the tyrosine hydroxylase promoter [TH:Cre+, Rat Research Resource Center,  
34  
35 RRRC#:659] were individually housed in a temperature controlled (22-23°C) vivarium,  
36  
37 and were moderately food restricted with 15 g of chow per day throughout the duration  
38  
39 of their training and experiments. This modest amount of food restriction permitted  
40  
41 gradual weight gain throughout training and testing. Rats were maintained on a  
42  
43 12hr:12hr light/dark cycle (lights on at 0700h). Procedures were approved by the  
44  
45 Institutional Animal Care and Use Committee at the University of Illinois at Chicago.  
46  
47  
48  
49

### 50 51 52 *Surgery*

53  
54 For all surgical procedures, rats were anesthetized and sedated via intramuscular  
55  
56 injections of ketamine (90 mg/kg), xylazine (2.8 mg/kg), and acepromazine (0.72  
57  
58 mg/kg). Animals were also given analgesic (subcutaneous injection of ketapofen  
59  
60  
61  
62  
63  
64  
65

1  
2  
3  
4 [5mg/kg] or meloxicam [0.1 mL of 5 mg/mL meloxicam]) after surgery and once daily  
5  
6 for 3 subsequent days thereafter). All animals recovered for at least one-week post-  
7  
8 surgery prior to experiments.  
9

10  
11 For central pharmacological oxytocin delivery, rats were surgically implanted  
12  
13 with indwelling guide cannula (26-gauge, Plastics One, Roanoke, VA) targeting the  
14  
15 lateral ventricle using the following stereotaxic coordinates, which are relative to the  
16  
17 location of bregma and dorsal/ventral (DV) coordinates relative to the skull surface at  
18  
19 the cannula implantation site: -0.9 mm anterior/posterior (AP), +1.8 mm medial/lateral  
20  
21 (ML), and -2.6 mm DV. Cannula were affixed to the skull as previously described using  
22  
23 jeweler's screws and dental cement (Liu et al., 2020). Following one week of recovery,  
24  
25 cannula placement was evaluated via measurement of cytogluopenia-induced  
26  
27 sympathoadrenal-mediated glycemic effect that occurs from 210  $\mu$ g (in 2  $\mu$ l) of 5-thio-D-  
28  
29 glucose (5TG) (Ritter et al., 1981). Food was removed 1 hr prior to the placement test.  
30  
31 Animals were injected with 5TG via injectors that extended 2 mm beyond the end of the  
32  
33 guide cannula, and blood glucose was measured at 30, 50, 90, and 120 min post-  
34  
35 injection. Placement was deemed correct if blood glucose doubled within the  
36  
37 measurement period. For animals who did not pass, injector length was adjusted until  
38  
39 correct placement was achieved.  
40  
41  
42  
43  
44  
45  
46  
47

48  
49 For fiber photometry, a Cre-dependent virus containing the construct for a  
50  
51 genetically encoded  $Ca^{2+}$  indicator (AAV1.Syn.Flex.GCaMP6f.WPRE.SV40) was  
52  
53 unilaterally administered to the VTA of TH:Cre+ rats (VTA; 1  $\mu$ l of 0.5e13 GC/mL: AP -  
54  
55 5.4, ML -0.7, DV -815, mm) using a rate of 0.1  $\mu$ l/min and a 5 min post infusion period  
56  
57 to allow for diffusion before the injector was removed. The combination of cre-  
58  
59  
60  
61  
62  
63  
64  
65

1  
2  
3  
4 dependent construct and transgenic rat leads to strong and selective construct  
5  
6 expression in dopamine neurons (Konanur et al. 2020; Decot et al. 2017). Next, an optic  
7  
8 fiber (flat 400um core, 0.48 NA, Doric Lenses Inc.) was implanted directly above the  
9  
10 injection site (AP -5.4, ML -0.7, DV -8.00). Lastly, an ICV cannula was implanted as  
11  
12 described above. Animals were given 2-week recovery prior to behavioral training  
13  
14  
15  
16 procedures.

## 21 *Behavior*

22  
23 *Conditioned Place Preference (CPP):* CPP training and testing procedures (Fig  
24  
25 1A) were conducted as described previously (Hsu et al., 2015; Kanoski et al., 2014;  
26  
27 Kanoski et al., 2011a). Briefly, the CPP apparatus consisted of two conjoined plexiglass  
28  
29 compartments with a guillotine door separating the two sides (Med Associates, Fairfax,  
30  
31 VT, USA). The two sides (contexts) were distinguished by wall color and floor texture.  
32  
33 Rats (n=18, 9/group) were given a one 15 min habituation session with the guillotine  
34  
35 door open and video recording to measure time spent in each context. For each rat, the  
36  
37 least preferred context during habituation was designated as the food-paired context for  
38  
39 subsequent training.  
40  
41  
42  
43  
44

45  
46 Training occurred in the early phase of the dark cycle and home-cage chow was  
47  
48 pulled 2.5 hr prior to each training session. CPP training consisted of 16 daily, 20-min  
49  
50 sessions: eight sessions isolate in the food-paired context and eight sessions isolated in  
51  
52 the non-food-paired context. Context training order was randomized. During the food-  
53  
54 paired sessions, 5 g of 45% kcal high fat/sucrose diet (D12451, Research Diets, New  
55  
56 Brunswick, NJ, USA) was placed on the chamber floor, and no food was presented  
57  
58  
59  
60  
61  
62  
63  
64  
65

1  
2  
3  
4 during non-food-paired sessions. All rats consumed the entire 5 g of during each food-  
5  
6 paired session.  
7

8  
9  
10 CPP testing occurred 2 days after the last training session using a between-  
11  
12 subjects design, and groups were matched for baseline context preference. Immediately  
13  
14 before the testing session, animals received either lateral ICV 1  $\mu$ g/1 $\mu$ l oxytocin  
15  
16 (Bachem, Torrance, CA, USA) or artificial cerebrospinal fluid (aCSF) vehicle injections.  
17  
18 During testing, the guillotine door remained open and rats were allowed to freely  
19  
20 explore both contexts for 15 min. No food was present during testing. Time spent in each  
21  
22 context during the test was later calculated from video recordings by an experimenter  
23  
24 blind to the group and context-food assignments. The dependent variable was the  
25  
26 percentage shift in preference for the food-associated context during testing compared  
27  
28 with the baseline session.  
29  
30  
31  
32  
33

34  
35  
36  
37  
38 *Differential reinforcement of low rates of responding (DRL):* DRL training and  
39  
40 testing procedures (Fig 2A) were conducted as described previously (Hsu et al., 2018b;  
41  
42 Noble et al., 2019). Rats (n=12) were first habituated in their home cage to consume  
43  
44 twenty 45 mg sucrose pellets (FOO23, Bio-Serv, Flemington, NJ, USA)). Throughout  
45  
46 DRL training (5 days/week), home cage chow was removed 1 h prior to training, which  
47  
48 began at the onset of the dark cycle, and was returned to animals following training.  
49  
50 During training, animals were placed in an operant chamber (Med Associates, Fairfax,  
51  
52 VT, USA) containing an active lever (reinforced with one 45 mg sucrose pellet) and an  
53  
54 inactive lever (non-reinforced). Training sessions were 45 min long, during which both  
55  
56 levers were extended for the entire duration. For the first five days of training, animals  
57  
58  
59  
60  
61  
62  
63  
64  
65

1  
2  
3  
4 were on a DRLO schedule, where each active lever press was reinforced with a 0 sec time  
5  
6 delay. Animals were then switched to a DRL5 schedule for five days, where rats had to  
7  
8 withhold presses on the active lever for at least a 5 sec interval for each active press to be  
9  
10 reinforced. Active lever presses that occurred before the 5 sec had elapsed were not  
11  
12 reinforced and the timer was restarted. Animals were then switched to 5 days of DRL10  
13  
14 (10 sec withholding period) and 10 days of DRL20 (20 sec withholding period).  
15  
16  
17 Efficiency in DRL was calculated as the number of pellets earned/the number of active  
18  
19 lever presses.  
20  
21  
22  
23

24 The DRL test was conducted using a within-subjects design. Oxytocin (Bachem,  
25  
26 Torrance, CA, USA) or aCSF vehicle treatment order was randomized and  
27  
28 counterbalanced based on efficiency during training, and treatments were separated by  
29  
30 72 h. On test days, home cage chow was removed 1 h prior and testing began at dark  
31  
32 onset. ICV injections of 1  $\mu\text{g}/\mu\text{l}$  oxytocin or vehicle were administered immediately prior  
33  
34 to testing on a DRL20 schedule.  
35  
36  
37  
38  
39  
40  
41

42 *Progressive Ratio (PROG) / Chow Feeding Choice Task:* Training and testing in  
43  
44 the PROG chow choice task (Fig 3A) was adapted from Salamone and colleagues  
45  
46 (Randall et al., 2012; SanMiguel et al., 2018; Yohn et al., 2016). Following surgical  
47  
48 recovery, rats (n=11) were brought down to and maintained at 85% of their free-feeding  
49  
50 body weight. Animals were habituated to twenty 45 mg sucrose pellets (FOO23, Bio-  
51  
52 Serv, Flemington, NJ, USA) in the home cage prior to training. Behavioral sessions (30  
53  
54 min, 5 days/wk) were conducted in operant conditioning chambers (Med Associates,  
55  
56 Fairfax, VT, USA) and began at the onset of the dark cycle. Rats were initially trained to  
57  
58  
59  
60  
61  
62  
63  
64  
65

1  
2  
3  
4 lever press on a FR1 schedule (one active lever press for 1 sucrose pellet) for 5 days, and  
5  
6 then shifted to a PROG schedule for 10 days. During the PROG session, the ratio started  
7  
8 at FR1 and sequentially increased by one every time 15 reinforcers were obtained (FR1 x  
9  
10 15, FR2 x 15, FR3 x 15....). Animals were then introduced to free chow (Laboratory  
11  
12 Rodent Diet 5001, St. Louis, MO, USA) concurrently available in addition to the PROG  
13  
14 sessions for 5 days. Active lever presses, inactive lever presses, pellets earned, highest  
15  
16 PROG ratio achieved, and chow intake (including spill) were recorded throughout  
17  
18 training.  
19  
20  
21  
22  
23

24 Testing in the PROG/Chow feeding choice task was conducted using a within-  
25  
26 subjects design, and treatments were separated by 72 h. Drug treatment order was  
27  
28 counterbalanced and matched by performance during the last day of training (ratio of  
29  
30 sucrose to chow intake, kCal). Animals received lateral ICV 1 µg/µl oxytocin (Bachem,  
31  
32 Torrance, CA, USA) or vehicle immediately prior to 30 min test session, where PROG  
33  
34 performance and chow intake was measured (just as in training sessions).  
35  
36  
37  
38  
39  
40  
41

42 *Incentive Learning:* Animals were trained in an instrumental incentive learning  
43  
44 task (Fig 4A), modified from (Wassum et al., 2011a; Wassum et al., 2011b; Wassum et  
45  
46 al., 2009). Animals (n=21, 6-8/group) were habituated to twenty 45 mg sucrose pellets  
47  
48 (F0023, Bio-Serv, Flemington, NJ, USA) in the home cage prior to training. Training  
49  
50 sessions occurred daily at the onset of the dark cycle, and food was pulled 1 hr prior to  
51  
52 the start of the session and returned 1 hr after completion of the session. Each session  
53  
54 started with insertion of the levers where appropriate and ended with retraction of the  
55  
56 levers.  
57  
58  
59  
60  
61  
62  
63  
64  
65

1  
2  
3  
4 For magazine and single-action instrumental training, rats received 3 d of  
5  
6 magazine training where they received 20 noncontingent sucrose deliveries in the  
7  
8 operant chamber with the levers retracted. Following magazine training, rats received 3  
9  
10 d of single-action instrumental training, where right lever presses were continuously  
11  
12 reinforced up to 20 pellets or 30 min elapsed.  
13  
14

15  
16  
17 Rats were next trained in the reward-delivery chain phase. Initially, only the left  
18  
19 (seeking) lever was retracted. One left lever press was rewarded by presentation of the  
20  
21 right (taking) lever, and one right lever press was rewarded with delivery of one 45 mg  
22  
23 sucrose pellet. This reward-delivery chain lasted until 20 pellets were earned or 30 min  
24  
25 elapsed. The seeking lever was continuously rewarded with the taking lever for four  
26  
27 sessions, then the reinforcement schedule was increased to random ratio (RR)-2 for four  
28  
29 sessions, and then to RR-4 until stable lever pressing was obtained (approximately three  
30  
31 to five sessions). The taking lever was always continuously rewarded (FR-1) and  
32  
33 retracted after sucrose delivery. Animals that did not earn 20 sucrose pellets on a RR-4  
34  
35 schedule were pulled out from the experiment.  
36  
37  
38  
39  
40

41  
42 For the US exposure phase, animals were then split into groups of 1 h restriction  
43  
44 (sated) + aCSF, 24 h restriction + aCSF, or 24 h restriction + oxytocin (Fig 4B). Animals  
45  
46 received 1 µg/µl oxytocin or vehicle ICV injections immediately prior to an exposure  
47  
48 session. Exposure session was held in a novel context, where all animals received 30  
49  
50 noncontingent sucrose pellets to consume in 40 min. The exposure session was followed  
51  
52 by 2 d of ad libitum re-feeding in the home cage.  
53  
54  
55

56  
57 For the incentive learning test session, all animals were 24 h food-deprived prior  
58  
59 to the test session that occurred in the operant chambers. Animals were tested under  
60  
61  
62  
63  
64  
65



1  
2  
3  
4 extinction in the reward-delivery train on an RR-4 reinforcement schedule for 4 min.

5  
6 Right lever presses, left lever presses, and seconds between right (taking) lever presses  
7  
8 were measured.  
9

10  
11  
12  
13  
14  
15 *Cue-predictive reward task for measurement of VTA dopamine neuron activity:*  
16

17  
18 After in vivo fiber photometry preparation, food restricted animals (n=7 for behavior;  
19  
20 n=4 for fiber photometry) were trained to associate a cue with brief access to sucrose.

21  
22 Training and experimental sessions were conducted during the light phase in standard  
23  
24 operant chambers (ENV-009A-CT, Med Associates, Fairfax, VT, USA). Animals  
25  
26 underwent daily training for 8 consecutive days. Each training session was comprised of  
27  
28 40 trials where a trial consisted of a 1 sec audio cue (4.5 kHz tone or white noise)  
29  
30 followed by either 20 sec availability of a retractable sipper containing a 0.3 M sucrose  
31  
32 solution (CS+ trials; n=20) or a dry sipper (CS- trials; n=20). Licks were timestamped  
33  
34 using a contact lickometer and controller (ENV-252 M; ENV-250, Med Associates Inc.).  
35  
36  
37

38  
39 The audio cue paired with each sipper was counterbalanced across rats. Trials were  
40  
41 separated by a randomly selected, variable inter-trial interval (32-48 sec). Following  
42  
43 eight training days, test sessions were conducted identical to training sessions but  
44  
45 lateral ventricle injections of vehicle, 0.3 µg/ µl oxytocin, or 1 µg/µl oxytocin (within-  
46  
47 subjects) were made immediately prior.  
48  
49  
50

51  
52  
53  
54 *Fiber Photometry and Signal Normalization*  
55

56  
57 For in vivo fiber photometry, LEDs delivered 465 nm (Ca<sub>2+</sub> dependent) and 405  
58  
59 nm (Ca<sub>2+</sub> independent) excitation. Intensity of the 465 nm and 405 nm light were  
60  
61  
62  
63  
64  
65

1  
2  
3  
4 sinusoidally modulated at 211 Hz and 531 Hz, respectively, for all recording sessions.  
5  
6 Intensity was then coupled to a filter cube (FMC4 contains excitation filters at 405 nm,  
7  
8 460–490 nm and emission filters at 500–550 nm, Doric Lenses), and converged into an  
9  
10 optical fiber patch cord mated to the fiber optic implant. GCaMP6f fluorescence was  
11  
12 collected and focused onto a photoreceiver (Visible Femtowatt Photo- receiver Model  
13  
14 2151, Newport). A lock-in amplifier and data acquisition system (RZ5P; Tucker Davis  
15  
16 Technologies) was used to demodulate 465 nm and 405 nm excited fluorescence.  
17  
18 Behavioral events (e.g. cue, licks) were timestamped and sent as digital inputs to the  
19  
20 same data acquisition system and recorded in software (Synapse Suite, Tucker Davis  
21  
22 Technologies). The signal was then processed with Fourier transformed subtraction to  
23  
24 calculate fluorescence due to fluctuations in  $\text{Ca}^{2+}$  and bleaching and movement artifacts  
25  
26 ( $\Delta F/F$ ). The subtracted signal was smoothed using a custom fifth order bandpass  
27  
28 butterworth filter (cutoff frequencies: 0.05 Hz, 2.25 Hz).  
29  
30  
31  
32  
33  
34  
35  
36

37 To compare behavior-related responses across recording sessions, the smoothed  
38  
39 Fourier subtracted  $\text{Ca}^{2+}$  specific signal of each session was normalized by the mean  
40  
41 transient  $\text{Ca}^{2+}$  amplitude of that session (Konanur et al., 2020). A transient was defined  
42  
43 as a point 3 standard deviations above the previous point. The normalized signal was  
44  
45 then aligned to a 15 sec cue window around cue onset. All data processing was  
46  
47 performed using custom MATLAB scripts (available upon request).  
48  
49  
50  
51  
52  
53  
54

### 55 *Statistical Analyses*

56  
57 Experiments 1-3 were analyzed using student's t-test. 15 min time blocks of active  
58  
59 presses, pellets earned, and efficiency in experiment 2 (DRL) were analyzed using two-  
60  
61  
62  
63  
64  
65

1  
2  
3  
4 way analysis of variance (ANOVA) with time and drug as within-subjects variables, and  
5  
6 Newman-Keuls post-hoc for multiple comparisons. Experiment 4 was analyzed using a  
7  
8 one-way ANOVA and Newman-Keuls post-hoc for multiple comparisons. Statistical  
9  
10 analyses were performed using Graphpad Prism 8 with an  $\alpha$  level of significance of  $p$   
11  
12  $< .05$ .  
13  
14

15  
16  
17 For experiment 5, acquisition of CS+/CS- discrimination was measured by 1<sup>st</sup> lick  
18  
19 latency and % of trials containing at least one lick. Analyses here utilized two-way  
20  
21 repeated measures ANOVA with cue and day as within-subjects variables. The  
22  
23 magnitude of cue-evoked dopamine neuron transients (mean of signal 0 s to 1 s after cue  
24  
25 onset) during CS+ compared to CS- were analyzed using student's t-test. In oxytocin  
26  
27 treatments involving fiber photometry, mean signal 1 s after cue onset and behavioral  
28  
29 measures in each drug treatment were compared using one-way repeated measures  
30  
31 ANOVAs. When drug main effects were found, Newman-Keuls post-hoc tests were used  
32  
33 to compare individual drug treatments. Behavior was analyzed with two-way repeated  
34  
35 measures ANOVA with trial bin (Trial 1-10; Trial 11-20) and drug as within-subjects  
36  
37 variables. Sidak's post-hoc tests were used to compare drug treatments. Statistical  
38  
39 analyses were computed using Graphpad Prism 6 with an  $\alpha$  level of significance of  $p <$   
40  
41  $.05$ .  
42  
43  
44  
45  
46  
47  
48  
49

## 50 **Results**

51  
52 *Experiment 1: Central oxytocin inhibits food seeking behavior in the absence of*  
53 *consumption (conditioned place preference expression)*  
54

55  
56 ICV oxytocin administration prior to testing significantly decreased conditioned  
57  
58 place preference expression for the palatable food-associated context relative to vehicle  
59  
60 (expressed as % shift from baseline preference, Fig 1B) ( $F_{[8,7]} = 5.087$ ,  $p = 0.03$ ),  
61  
62  
63  
64  
65

1  
2  
3  
4 suggesting that central oxytocin signaling reduces palatable food seeking behavior in the  
5  
6 absence of consumption.  
7  
8  
9

10  
11 *Experiment 2: Central oxytocin decreases food impulsivity (differential reinforcement*  
12 *of low rates of responding task)*  
13  
14

15 ICV administration of oxytocin significantly suppressed impulsive behavior in the  
16  
17 DRL20 schedule (Fig 2). Oxytocin significantly increased the average number of seconds  
18  
19 between active lever presses ( $t_{[11]} = 6.17$ ,  $p < 0.0001$ , fig 2C). Vehicle-treated animals  
20  
21 waited an average of 26.05 sec between active lever presses, whereas ICV oxytocin-  
22  
23 treated animals waited an average of 92.95 sec between active lever presses.  
24  
25 Furthermore, ICV oxytocin significantly decreased the number of sucrose pellets earned  
26  
27 ( $t_{[11]} = 9.17$ ,  $p < 0.0001$ , fig 2D) and active lever presses ( $t_{[11]} = 9.04$ ,  $p < 0.0001$ , fig 2E)  
28  
29 in the DRL test. There were also no significant differences in number of inactive lever  
30  
31 presses (fig 2F). Overall efficiency during the test (fig 2G), a measure of impulsive  
32  
33 behavior, was calculated by dividing pellets earned by number of active lever presses.  
34  
35 ICV oxytocin treatment significantly increased efficiency in the task ( $t_{[11]} = 5.11$ ,  $p =$   
36  
37  $0.0003$ , fig 2B), indicating reduced impulsivity. When efficiency is broken down into  
38  
39 three 15 min time blocks, there is a significant time ( $p < 0.0001$ ) and drug ( $p < 0.01$ )  
40  
41 main effect, but no significant time by drug interaction. However, post-hoc analyses  
42  
43 reveal significant differences in efficiency between oxytocin and vehicle treatments in  
44  
45 the first 15 min, but not the mid 15 min or last 15 min (fig 2J).  
46  
47  
48  
49  
50  
51  
52  
53  
54  
55

56 *Experiment 3: Central oxytocin shifts food choice from high-effort palatable towards*  
57 *low-effort bland food (PROG versus chow choice task)*  
58  
59  
60  
61  
62  
63  
64  
65

1  
2  
3  
4 Motivated behaviors are often characterized by increased work, so we tested  
5  
6 effort-based decision making using the PROG versus choice task. Oxytocin significantly  
7  
8 decreased pellets earned ( $t_{[10]} = 7.76, p < 0.0001$ , Fig 3B), highest PROG ratio achieved  
9  
10 ( $t_{[10]} = 5.63, p = 0.0002$ , fig 3C), and free chow consumption ( $t_{[10]} = 2.51, p = 0.03$ , fig  
11  
12 3E). Moreover, oxytocin significantly decreased the ratio of sucrose over total intake  
13  
14 ( $t_{[10]} = 4.29, p = 0.0016$ ), suggesting a preferential decrease in motivation for high-effort  
15  
16 sucrose in favor of low-effort chow.  
17  
18  
19  
20  
21  
22

23  
24 *Experiment 4: Central oxytocin does not affect postingestive reward value encoding*  
25 *(incentive learning task)*  
26

27 Incentive learning is the process modifying the incentive value of a specific food  
28  
29 through outcome-nutritive state learning (Balleine, 2001; Balleine and Dickinson,  
30  
31 1998a; Balleine and Dickinson, 1998b). Results reveal that ICV oxytocin did not  
32  
33 influence the capacity of food restriction to update/enhance the incentive value of  
34  
35 consuming sucrose. Analysis of reward seeking behavior during testing (as a percent of  
36  
37 baseline) revealed a significant group effect ( $F_{[2,16]} = 4.52, p = 0.005$ ). Posthoc  
38  
39 comparisons revealed that the dep aCSF and dep oxytocin groups were significantly  
40  
41 different from the sated aCSF group, but not from each other.  
42  
43  
44  
45  
46  
47  
48  
49  
50

51 *Experiment 5: Central oxytocin administration suppresses VTA phasic dopamine*  
52 *neuron activity in response to cues associated with palatable food.*  
53

54 Animals were trained to discriminate between a CS+ that predicted the  
55  
56 presentation of sucrose reward and a CS- that predicted no reinforcement. As training  
57  
58 progressed, rats successfully discriminated between CS+ and CS- cues as measured by  
59  
60  
61  
62  
63  
64  
65

1  
2  
3  
4 significant differences in latency to first lick and percent of trials with a lick (Fig 5A  
5  
6 (left):  $F_{[7, 42]} = 7.866$ ,  $p < 0.05$  main effect of day;  $F_{[1, 6]} = 278.7$  main effect of cue;  $F_{[7, 42]} =$   
7  
8  $24.10$   $p < 0.05$  day x cue interaction. Fig 5A (right):  $F_{[7, 42]} = 2.012$   $p = 0.08$  main effect of  
9  
10 day;  $F_{[1, 6]} = 257.7$   $p < 0.05$  main effect of cue;  $F_{[7, 42]} = 16.44$   $p < 0.05$  day x cue  
11  
12 interaction). Fiber photometry (Fig 5B) revealed a robust, time-locked dopamine  
13  
14 response to the CS+, but not the CS- (Fig 5C;  $t(3) = 8.49$   $p < 0.05$ ). Interestingly, we  
15  
16 found no effect of central oxytocin on cue-evoked VTA phasic dopamine activity across  
17  
18 the entirety of the behavioral session (data not shown). However, upon closer  
19  
20 examination of cue-evoked signal on a trial-by-trial basis, we observed that effects of  
21  
22 central oxytocin appeared to affect CS+ responses early in the test session (Fig 5D).  
23  
24 Indeed, central oxytocin at both the 0.3  $\mu$ g and 1  $\mu$ g dose significantly reduced cue-  
25  
26 evoked VTA phasic dopamine responses when comparing across the first 10 trials of the  
27  
28 test session (Fig 5E;  $F_{[2, 6]} = 8.880$   $p < 0.05$  main effect of drug; Post-hoc:  $p < 0.05$  vehicle  
29  
30 vs. 0.3  $\mu$ g oxytocin, vehicle vs. 1  $\mu$ g OT). Importantly, this oxytocin mediated reduction  
31  
32 in cue-evoked VTA phasic dopamine activity occurred concomitantly with behavior,  
33  
34 where there is a significant increase in latency to first lick (Fig 5F:  $F_{[2, 12]} = 8.117$ ,  $p < 0.05$   
35  
36 main effect of drug;  $F_{[1, 6]} = 6.520$ ,  $p < 0.05$  main effect of trial; Sidak post hoc:  $p < 0.05$   
37  
38 veh vs. 1 $\mu$ g OT). However, there was no drug x trial interaction ( $F_{[2, 12]} = 0.742$ ,  $p > 0.05$ ).  
39  
40  
41  
42  
43  
44  
45  
46  
47  
48  
49  
50  
51  
52  
53  
54  
55  
56  
57  
58  
59  
60  
61  
62  
63  
64  
65

## Discussion and Conclusions

Central oxytocin signaling potently reduces food intake and plays a key role in regulating overall energy balance (Blevins and Ho, 2013; Leng et al., 2008). The behavioral and neuronal mechanisms mediating these effects, however, are poorly understood. In order to probe the behavioral intricacies through which oxytocin inhibits food intake, we looked at the effect of central (lateral ICV) oxytocin administration in a number of distinct conditioned palatable food reinforcement-associated behavioral tasks. Results reveal that central oxytocin reduced palatable food seeking behavior in the absence of consumption in a nonreinforced conditioned place preference test. ICV oxytocin also suppressed effort-based palatable food-directed operant responding under ad libitum-fed (nonrestricted) conditions in the DRL task, resulting in a higher task efficiency which is indicative of reduced impulsivity. Consistent with these results, ICV oxytocin reduced effort-based operant responding for palatable food under food-restricted conditions in the PROG vs. chow choice task, where oxytocin shifted the ratio of food consumed from effort-based responding (lever pressing) on a PROG schedule for a preferred food (sucrose) to the less preferred lab chow that is freely available in the apparatus. Additional results show that central oxytocin signaling did not influence incentive learning, or the process in which animals learn about the value of rewards based on postingestive feedback. Overall these findings show that central oxytocin signaling reduces palatable food-directed responses under various conditions but does not significantly influence the postingestive reinforcing properties of sucrose consumption.

1  
2  
3  
4           Modulation of phasic dopamine neural responses is a feasible mechanism  
5  
6 through which oxytocin suppresses palatable food-directed responses, as the  
7  
8 conditioned place preference test, DRL impulsivity test, and PROG vs. chow choice test  
9  
10 are all influenced by pharmacological manipulations targeting dopamine receptors  
11  
12 (Randall et al., 2012; Simon et al., 2013; Spyraiki et al., 1982). Moreover, oxytocin  
13  
14 neurons in the paraventricular hypothalamic nucleus (PVH) directly project to VTA  
15  
16 dopamine neurons (Beier et al., 2015; Peris et al., 2017; Xiao et al., 2017) and oxytocin  
17  
18 administration to the VTA suppresses sucrose intake (Mullis et al., 2013). Here we  
19  
20 recorded phasic dopamine neuron calcium activity in awake and behaving male rats in  
21  
22 an appetitive Pavlovian conditioning task and results revealed that central oxytocin  
23  
24 administration suppressed food (sucrose) cue-evoked dopamine neuron responses and  
25  
26 associated measures of appetitive behaviors (1<sup>st</sup> lick latency). These effects were  
27  
28 observed during the first ten trials only (within ~20 min into the session), which  
29  
30 suggests that oxytocin-mediated inhibition of food reward seeking behavior, consistent  
31  
32 with effects on reducing chow intake (Ho et al., 2014; Liu et al., 2020; Ong et al., 2015),  
33  
34 is immediate and short-lasting. By providing an immediate and brief anorexigenic  
35  
36 signal, oxytocin may be involved in attention-redirection for need-based prioritization of  
37  
38 behavior (e.g., contextual and energetic state-driven shifting between appetitive and  
39  
40 social behavior) (Burnett et al., 2019), which is an area for future investigation.  
41  
42  
43  
44  
45  
46  
47  
48  
49

50  
51           Electrophysiological studies demonstrate that oxytocin administration, as well as  
52  
53 optogenetic stimulation of oxytocinergic terminals, enhances activity of VTA dopamine  
54  
55 neurons (Xiao et al., 2017). In contrast, systemic oxytocin administration reduces  
56  
57 dopamine release (as measured by in vivo fixed potential amperometry) in the nucleus  
58  
59  
60  
61  
62  
63  
64  
65



1  
2  
3  
4 accumbens under baseline conditions and following nomifensine, a dopamine reuptake  
5  
6 inhibitor (Estes et al., 2019). Consistent with this latter report, present results reveal  
7  
8 reduced dopamine neuron activity in response to presentation of a sucrose-conditioned  
9  
10 cue. It is possible these conflicting results occur because, while oxytocin reduces  
11  
12 motivated behavior for palatable food, oxytocin enhances social reward and modulates  
13  
14 attention-orienting responses to external contextual social cues (Shamay-Tsoory and  
15  
16 Abu-Akel, 2016). Indeed, VTA oxytocin administration increases dopamine release in  
17  
18 the nucleus accumbens in response to sociality and activation of this circuit enhances  
19  
20 prosocial behaviors (Hung et al., 2017; Shahrokh et al., 2010), an effect that occurs  
21  
22 through coordinated activity with serotonin (Dolen et al., 2013). Thus, the influence of  
23  
24 oxytocin signaling on dopamine neural responses may be dependent on the conditions  
25  
26 of behavioral testing, with oxytocin enhancing dopamine signaling in the context of  
27  
28 sociality, and reducing dopamine signaling in the context of food-associated stimuli. In  
29  
30 addition to a complex reinforcement-dependent relationship between oxytocin and  
31  
32 dopamine signaling, oxytocin has also been proposed to be conditionally anorexigenic  
33  
34 depending on social context (Olszewski et al., 2016). For example, intranasal oxytocin  
35  
36 increases food sharing in the common vampire bat (Carter and Wilkinson, 2015) and  
37  
38 peripheral oxytocin has been shown to enhance the social transmission of food  
39  
40 preference in rats (Popik and Van Ree, 1993). Moreover, hierarchy social factors  
41  
42 influence the effectiveness of oxytocin receptor ligands on food intake. Specifically,  
43  
44 administration of an oxytocin receptor antagonist in dominant mice increases the  
45  
46 amount of sugar consumed regardless of social or nonsocial contexts, whereas in  
47  
48 subordinate animals, it only increases the amount of sugar consumed in a setting devoid  
49  
50 of social cues (Olszewski et al., 2015). Future studies are needed to directly examine  
51  
52  
53  
54  
55  
56  
57  
58  
59  
60  
61  
62  
63  
64  
65

1  
2  
3  
4 whether oxytocin's influence on dopamine signaling and motivated behavior are  
5  
6 dependent on the nature of the reinforcement and context.  
7  
8

9  
10 Our findings demonstrate that while dopamine-associated conditioned food  
11  
12 reward-directed behaviors were suppressed under various conditions following ICV  
13  
14 oxytocin administration, central oxytocin did not influence incentive learning.  
15  
16 Specifically, ICV oxytocin did not alter food reward seeking behavior following learned  
17  
18 postingestive-mediated changes in sucrose value that occur following an energetic  
19  
20 motivational shift (from satiety to hunger). These results are consistent with previous  
21  
22 literature demonstrating that instrumental incentive learning, using procedures similar  
23  
24 to those in the present study, is not affected by treatment of flupenthixol, a D1 and D2  
25  
26 receptor antagonist (Wassum et al., 2011b). Furthermore, our incentive learning results  
27  
28 suggest that oxytocin may act downstream via a ventral and not dorsal striatal pathway  
29  
30 to influence food-motivated behavior. For example, Tellez and colleagues identified  
31  
32 dissociable basal ganglia sensorimotor circuits that encode hedonic versus metabolic  
33  
34 values of reward (Tellez et al., 2016), where dorsal striatal descending pathways are  
35  
36 recruited to encode the nutritional (postingestive) aspects of food, and ventral striatum  
37  
38 descending pathways transmit hedonic (flavor) value of food. These findings combined  
39  
40 with present results support a putative model in which oxytocin signals downstream to  
41  
42 ventral striatal dopaminergic pathways to reduce conditioned food cue-directed  
43  
44 motivated behaviors, without influencing dorsal striatum-mediated postingestive  
45  
46 incentive learning.  
47  
48  
49  
50  
51  
52  
53  
54  
55

56 While present results identify a role for central oxytocin signaling in modulating  
57  
58 palatable food cue-directed behavior and mesolimbic dopamine signaling, the mediating  
59  
60  
61  
62  
63  
64  
65

1  
2  
3  
4 sites of action require further investigation. Oxytocin receptors are expressed widely in  
5  
6 various feeding-associated regions throughout the brain, including in the amygdaloid  
7  
8 complex, VTA, hippocampus, basal ganglia, prefrontal cortex, caudal brainstem, and  
9  
10 hypothalamus (Freund-Mercier et al., 1987; Otero-Garcia et al., 2016). In addition to the  
11  
12 VTA, one region that may be relevant to present results is the ventral subregion of the  
13  
14 hippocampus, which has robust oxytocin receptor expression (Freund-Mercier et al.,  
15  
16 1987) and has been shown to be involved in food impulsivity (Noble et al., 2019),  
17  
18 conditioned place preference for palatable food (Kanoski et al., 2011b; Zhou et al., 2019),  
19  
20 and striatal dopamine (Kanoski et al., 2013). Additionally, the prefrontal cortex plays a  
21  
22 critical role in effort-related food choice behavior (Walton et al., 2002) as well as food  
23  
24 impulsivity (Hsu et al., 2018b). These and other potential sites of action should be  
25  
26 explored in future studies, as they may act in conjunction and/or in parallel with  
27  
28 dopaminergic mesolimbic ventral striatal pathways to mediate oxytocin's suppression of  
29  
30 palatable food cue-directed responses.  
31  
32  
33  
34  
35  
36  
37

38  
39 Collectively, our results reveal that central oxytocin administration inhibits  
40  
41 motivated behaviors in response to conditioned food cues under various conditions.  
42  
43 Furthermore, oxytocin suppresses food cue-evoked phasic VTA dopamine neuron  
44  
45 responses, thus providing a potential neurobiological mechanism for the capacity of  
46  
47 central oxytocin signaling to rapidly inhibit palatable food-directed behavior. These  
48  
49 results illuminate novel behavioral and neurochemical mechanisms through which  
50  
51 oxytocin inhibits food intake, thus further supporting oxytocin's potential as a target  
52  
53 system for obesity pharmacotherapy development.  
54  
55  
56  
57  
58  
59  
60  
61  
62  
63  
64  
65

1  
2  
3  
4  
5  
6  
7  
8  
9  
10  
11  
12  
13  
14  
15  
16  
17  
18  
19  
20  
21  
22  
23  
24  
25  
26  
27  
28  
29  
30  
31  
32  
33  
34  
35  
36  
37  
38  
39  
40  
41  
42  
43  
44  
45  
46  
47  
48  
49  
50  
51  
52  
53  
54  
55  
56  
57  
58  
59  
60  
61  
62  
63  
64  
65

## **Acknowledgements**

We thank Elizabeth Davis, Sarah Terrill, Linda Tsan, and Lekha Chirala for their critical contributions to the research. This study was supported by the National Institute of Health grants: DK118402 (SEK), DK104897 (SEK), DA025634 (MFR), DK111158 (EEN), DA047052 (TMH), DK118944 (CML), DK116558 (ANS).

## **Competing Interests**

The authors have nothing to disclose.

1  
2  
3  
4 **Figure Captions**  
5  
6  
7

8 *Figure 1: ICV oxytocin suppresses food seeking behavior in the conditioned place*  
9 *preference (CPP) test. (A) Schematic of CPP training and test procedures. (B) Effect of*  
10 *ICV oxytocin on time spent on food-paired side during the test (represented as a percent*  
11 *shift from baseline). Data are mean  $\pm$  SEM; \* $p < 0.05$ .*  
12  
13  
14  
15  
16  
17  
18  
19  
20  
21

22 *Figure 2: ICV oxytocin reduces impulsive responding in the differential reinforcement*  
23 *of low rates of responding (DRL) task. (A) Schematic of DRL training and testing*  
24 *procedures. (B) Efficiency (pellets earned divided by number of active lever presses)*  
25 *over the last 10 days of training. (C) Efficiency for entire test session (45 min) following*  
26 *ICV administration of oxytocin. (D-F) Total inactive lever presses, active lever presses,*  
27 *and sucrose pellets earned for entire test session following ICV administration of*  
28 *oxytocin. (G) Average seconds between right lever presses following ICV administration*  
29 *of oxytocin for entire test session. (H-J) Active lever presses, pellets earned, and*  
30 *efficiency broken into 15 min time blocks following ICV administration of oxytocin. Data*  
31 *are mean  $\pm$  SEM; \* $p < 0.05$ .*  
32  
33  
34  
35  
36  
37  
38  
39  
40  
41  
42  
43  
44  
45

46 *Figure 3: ICV oxytocin suppresses effort-based consumption of sucrose over freely*  
47 *available chow in a PROG chow choice task. (A) Schematic of the PROG chow choice*  
48 *task. (B) Ratio of sucrose intake over total intake (kCal) over the course of five days*  
49 *training in decision-making task. (C-E) Highest PROG ratio achieved, number of*  
50 *sucrose pellets earned, and free chow intake following ICV oxytocin administration. (F)*  
51  
52  
53  
54  
55  
56  
57  
58  
59  
60  
61  
62  
63  
64  
65

1  
2  
3  
4 Ratio of sucrose intake over total intake (kCal) following ICV oxytocin administration.

5  
6 Data are mean  $\pm$  SEM; \* $p < 0.05$ .

7  
8  
9  
10 *Figure 4: Oxytocin does not play a role in postingestive reward value encoding in an*  
11 *instrumental incentive learning task. (A) Schematic of reward-delivery chain in an*  
12 *instrumental incentive learning task. (B) Table outlining drug treatment and*  
13 *deprivation state for three experimental groups: sated aCSF, dep aCSF, dep oxytocin.*  
14 *(C) Reward seeking behavior (% baseline) on the reward delivery chain represented by*  
15 *rate of presses on the right (taking) lever during 4 min extinction session. All animals*  
16 *tested under 24 hr food deprivation. Data are mean  $\pm$  SEM; \* $p < 0.05$ .*  
17  
18  
19  
20  
21  
22  
23  
24  
25  
26  
27  
28

29  
30 *Figure 5: ICV oxytocin suppresses food cue-evoked dopamine neuron response in the*  
31 *ventral tegmental area. (A) First lick latency and % trials with licks following CS+ and*  
32 *CS- during training, where CS+ precedes sucrose presentation and CS- precedes no food*  
33 *reward. (B) Experimental schematic of fiber photometry and oxytocin pharmacology in*  
34 *TH:Cre+ rats. (C) Representative trace (left) and quantitative  $\Delta F/F$  (right) of phasic*  
35 *dopamine activity aligned to the CS+ and CS- cues following training. (D) Color plot of*  
36 *dopamine fluctuations during 15 sec window surrounding presentation of the CS+ and*  
37 *following ICV administration of 0.3  $\mu$ g or 1  $\mu$ g oxytocin. Red boxes highlight first ten*  
38 *trials, where oxytocin had greatest effect on phasic dopamine signal. (E) Representative*  
39 *traces (left) and quantitative  $\Delta F/F$  (right) of cue-evoked phasic dopamine during 15 sec*  
40 *window surrounding presentation of the CS+ and following ICV administration of 0.3  $\mu$ g*  
41 *or 1  $\mu$ g oxytocin. (F) Average latency to the first lick following ICV administration of 0.3*  
42  
43  
44  
45  
46  
47  
48  
49  
50  
51  
52  
53  
54  
55  
56  
57  
58  
59  
60  
61  
62  
63  
64  
65

1  
2  
3  
4  
5  
6  
7  
8  
9  
10  
11  
12  
13  
14  
15  
16  
17  
18  
19  
20  
21  
22  
23  
24  
25  
26  
27  
28  
29  
30  
31  
32  
33  
34  
35  
36  
37  
38  
39  
40  
41  
42  
43  
44  
45  
46  
47  
48  
49  
50  
51  
52  
53  
54  
55  
56  
57  
58  
59  
60  
61  
62  
63  
64  
65

$\mu\text{g}$  or  $1 \mu\text{g}$  oxytocin in the first ten trials and last ten trials. Data are mean  $\pm$  SEM;

\* $p < 0.05$ .

## Works Cited

- Affleck, V.S., Coote, J.H., Pyner, S., 2012. The projection and synaptic organisation of NTS afferent connections with presympathetic neurons, GABA and nNOS neurons in the paraventricular nucleus of the hypothalamus. *Neuroscience* 219, 48-61.
- Atasoy, D., Betley, J.N., Su, H.H., Sternson, S.M., 2012. Deconstruction of a neural circuit for hunger. *Nature* 488, 172-177.
- Balleine, B.W., 2001. Incentive processes in instrumental conditioning, in: Mowrer, R.R., Klein, S.B. (Eds.), *Handbook of contemporary learning theories*. Lawrence Erlbaum Associates, Publishers, U California, Los Angeles, CA, US Mahwah, NJ, pp. 307-366.
- Balleine, B.W., Dickinson, A., 1998a. Goal-directed instrumental action: contingency and incentive learning and their cortical substrates. *Neuropharmacology* 37, 407-419.
- Balleine, B.W., Dickinson, A., 1998b. The role of incentive learning in instrumental outcome revaluation by sensory-specific satiety. *Animal Learning & Behavior* 26, 46-59.
- Beier, K.T., Steinberg, E.E., DeLoach, K.E., Xie, S., Miyamichi, K., Schwarz, L., Gao, X.J., Kremer, E.J., Malenka, R.C., Luo, L., 2015. Circuit Architecture of VTA Dopamine Neurons Revealed by Systematic Input-Output Mapping. *Cell* 162, 622-634.
- Berridge, K.C., 2007. The debate over dopamine's role in reward: the case for incentive salience. *Psychopharmacology* 191, 391-431.
- Blevins, J.E., Eakin, T.J., Murphy, J.A., Schwartz, M.W., Baskin, D.G., 2003. Oxytocin innervation of caudal brainstem nuclei activated by cholecystokinin. *Brain research* 993, 30-41.
- Blevins, J.E., Ho, J.M., 2013. Role of oxytocin signaling in the regulation of body weight. *Reviews in endocrine & metabolic disorders* 14, 311-329.
- Burnett, C.J., Funderburk, S.C., Navarrete, J., Sabol, A., Liang-Guallpa, J., Desrochers, T.M., Krashes, M.J., 2019. Need-based prioritization of behavior. *eLife* 8.
- Caqueneau, C., Leng, G., Guan, X.M., Jiang, M., Van der Ploeg, L., Douglas, A.J., 2006. Effects of alpha-melanocyte-stimulating hormone on magnocellular oxytocin neurones and their activation at intromission in male rats. *Journal of neuroendocrinology* 18, 685-691.
- Carter, G.G., Wilkinson, G.S., 2015. Intranasal oxytocin increases social grooming and food sharing in the common vampire bat *Desmodus rotundus*. *Hormones and behavior* 75, 150-153.
- Dolen, G., Darvishzadeh, A., Huang, K.W., Malenka, R.C., 2013. Social reward requires coordinated activity of nucleus accumbens oxytocin and serotonin. *Nature* 501, 179-184.
- Estes, M.K., Freels, T.G., Prater, W.T., Lester, D.B., 2019. Systemic oxytocin administration alters mesolimbic dopamine release in mice. *Neuroscience* 408, 226-238.
- Fenselau, H., Campbell, J.N., Verstegen, A.M., Madara, J.C., Xu, J., Shah, B.P., Resch, J.M., Yang, Z., Mandelblat-Cerf, Y., Livneh, Y., Lowell, B.B., 2017. A rapidly acting glutamatergic ARC-->PVH satiety circuit postsynaptically regulated by alpha-MSH. *Nature neuroscience* 20, 42-51.
- Ferrario, C.R., Labouebe, G., Liu, S., Nieh, E.H., Routh, V.H., Xu, S., O'Connor, E.C., 2016. Homeostasis Meets Motivation in the Battle to Control Food Intake. *The Journal of neuroscience : the official journal of the Society for Neuroscience* 36, 11469-11481.
- Freund-Mercier, M.J., Stoeckel, M.E., Palacios, J.M., Pazos, A., Reichhart, J.M., Porte, A., Richard, P., 1987. Pharmacological characteristics and anatomical distribution of [3H]oxytocin-binding sites in the Wistar rat brain studied by autoradiography. *Neuroscience* 20, 599-614.
- Ho, J.M., Anekonda, V.T., Thompson, B.W., Zhu, M., Curry, R.W., Hwang, B.H., Morton, G.J., Schwartz, M.W., Baskin, D.G., Appleyard, S.M., Blevins, J.E., 2014. Hindbrain oxytocin receptors contribute to the effects of circulating oxytocin on food intake in male rats. *Endocrinology* 155, 2845-2857.



- 1  
2  
3  
4 Hsu, T.M., Hahn, J.D., Konanur, V.R., Lam, A., Kanoski, S.E., 2015. Hippocampal GLP-1 receptors influence  
5 food intake, meal size, and effort-based responding for food through volume transmission.  
6 *Neuropsychopharmacology* 40, 327-337.
- 7 Hsu, T.M., McCutcheon, J.E., Roitman, M.F., 2018a. Parallels and Overlap: The Integration of  
8 Homeostatic Signals by Mesolimbic Dopamine Neurons. *Front Psychiatry* 9, 410.
- 9 Hsu, T.M., Noble, E.E., Liu, C.M., Cortella, A.M., Konanur, V.R., Suarez, A.N., Reiner, D.J., Hahn, J.D.,  
10 Hayes, M.R., Kanoski, S.E., 2018b. A hippocampus to prefrontal cortex neural pathway inhibits food  
11 motivation through glucagon-like peptide-1 signaling. *Mol Psychiatry* 23, 1555-1565.
- 12 Hung, L.W., Neuner, S., Polepalli, J.S., Beier, K.T., Wright, M., Walsh, J.J., Lewis, E.M., Luo, L., Deisseroth,  
13 K., Dolen, G., Malenka, R.C., 2017. Gating of social reward by oxytocin in the ventral tegmental area.  
14 *Science (New York, N.Y.)* 357, 1406-1411.
- 15 Johnson, A.W., 2013. Eating beyond metabolic need: how environmental cues influence feeding  
16 behavior. *Trends Neurosci* 36, 101-109.
- 17 Kanoski, S.E., Alhadeff, A.L., Fortin, S.M., Gilbert, J.R., Grill, H.J., 2014. Leptin signaling in the medial  
18 nucleus tractus solitarius reduces food seeking and willingness to work for food.  
19 *Neuropsychopharmacology* 39, 605.
- 20 Kanoski, S.E., Fortin, S.M., Ricks, K.M., Grill, H.J., 2013. Ghrelin signaling in the ventral hippocampus  
21 stimulates learned and motivational aspects of feeding via PI3K-Akt signaling. *Biological psychiatry* 73,  
22 915-923.
- 23 Kanoski, S.E., Hayes, M.R., Greenwald, H.S., Fortin, S.M., Gianessi, C.A., Gilbert, J.R., Grill, H.J., 2011a.  
24 Hippocampal leptin signaling reduces food intake and modulates food-related memory processing.  
25 *Neuropsychopharmacology* 36, 1859-1870.
- 26 Kanoski, S.E., Hayes, M.R., Greenwald, H.S., Fortin, S.M., Gianessi, C.A., Gilbert, J.R., Grill, H.J., 2011b.  
27 Hippocampal leptin signaling reduces food intake and modulates food-related memory processing.  
28 *Neuropsychopharmacology : official publication of the American College of Neuropsychopharmacology*  
29 36, 1859-1870.
- 30 Katsurada, K., Maejima, Y., Nakata, M., Kodaira, M., Suyama, S., Iwasaki, Y., Kario, K., Yada, T., 2014.  
31 Endogenous GLP-1 acts on paraventricular nucleus to suppress feeding: projection from nucleus tractus  
32 solitarius and activation of corticotropin-releasing hormone, nesfatin-1 and oxytocin neurons. *Biochem*  
33 *Biophys Res Commun* 451, 276-281.
- 34 Konanur, V.R., Hsu, T.M., Kanoski, S.E., Hayes, M.R., Roitman, M.F., 2020. Phasic dopamine responses to  
35 a food-predictive cue are suppressed by the glucagon-like peptide-1 receptor agonist Exendin-4.  
36 *Physiology & behavior* 215, 112771.
- 37 Larsen, P.J., Tang-Christensen, M., Jessop, D.S., 1997. Central administration of glucagon-like peptide-1  
38 activates hypothalamic neuroendocrine neurons in the rat. *Endocrinology* 138, 4445-4455.
- 39 Lawson, E.A., 2017. The effects of oxytocin on eating behaviour and metabolism in humans. *Nature*  
40 *reviews. Endocrinology* 13, 700-709.
- 41 Leng, G., Onaka, T., Caquineau, C., Sabatier, N., Tobin, V.A., Takayanagi, Y., 2008. Oxytocin and appetite.  
42 *Progress in brain research* 170, 137-151.
- 43 Liu, C.M., Davis, E.A., Suarez, A.N., Wood, R.I., Noble, E.E., Kanoski, S.E., 2020. Sex Differences and  
44 Estrous Influences on Oxytocin Control of Food Intake. *Neuroscience*.
- 45 Liu, C.M., Kanoski, S.E., 2018. Homeostatic and non-homeostatic controls of feeding behavior: Distinct  
46 vs. common neural systems. *Physiology & behavior* 193, 223-231.
- 47 Maejima, Y., Sedbazar, U., Suyama, S., Kohno, D., Onaka, T., Takano, E., Yoshida, N., Koike, M.,  
48 Uchiyama, Y., Fujiwara, K., Yashiro, T., Horvath, T.L., Dietrich, M.O., Tanaka, S., Dezaki, K., Oh, I.S.,  
49 Hashimoto, K., Shimizu, H., Nakata, M., Mori, M., Yada, T., 2009. Nesfatin-1-regulated oxytocinergic  
50 signaling in the paraventricular nucleus causes anorexia through a leptin-independent melanocortin  
51 pathway. *Cell metabolism* 10, 355-365.
- 52  
53  
54  
55  
56  
57  
58  
59  
60  
61  
62  
63  
64  
65

- 1  
2  
3  
4 Motojima, Y., Kawasaki, M., Matsuura, T., Saito, R., Yoshimura, M., Hashimoto, H., Ueno, H., Maruyama,  
5 T., Suzuki, H., Ohnishi, H., Sakai, A., Ueta, Y., 2016. Effects of peripherally administered cholecystokinin-8  
6 and secretin on feeding/drinking and oxytocin-mRFP1 fluorescence in transgenic rats. *Neuroscience*  
7 *research* 109, 63-69.  
8  
9 Mullis, K., Kay, K., Williams, D.L., 2013. Oxytocin action in the ventral tegmental area affects sucrose  
10 intake. *Brain research* 1513, 85-91.  
11 Noble, E.E., Billington, C.J., Kotz, C.M., Wang, C., 2014. Oxytocin in the ventromedial hypothalamic  
12 nucleus reduces feeding and acutely increases energy expenditure. *American journal of physiology.*  
13 *Regulatory, integrative and comparative physiology* 307, R737-745.  
14 Noble, E.E., Wang, Z., Liu, C.M., Davis, E.A., Suarez, A.N., Stein, L.M., Tsan, L., Terrill, S.J., Hsu, T.M., Jung,  
15 A.H., Raycraft, L.M., Hahn, J.D., Darvas, M., Cortella, A.M., Schier, L.A., Johnson, A.W., Hayes, M.R.,  
16 Holschneider, D.P., Kanoski, S.E., 2019. Hypothalamus-hippocampus circuitry regulates impulsivity via  
17 melanin-concentrating hormone. *Nature communications* 10, 4923.  
18 Olszewski, P.K., Allen, K., Levine, A.S., 2015. Effect of oxytocin receptor blockade on appetite for sugar is  
19 modified by social context. *Appetite* 86, 81-87.  
20 Olszewski, P.K., Klockars, A., Levine, A.S., 2016. Oxytocin: A Conditional Anorexigen whose Effects on  
21 Appetite Depend on the Physiological, Behavioural and Social Contexts. *Journal of neuroendocrinology*  
22 28.  
23 Olszewski, P.K., Klockars, A., Levine, A.S., 2017. Oxytocin and potential benefits for obesity treatment.  
24 *Current opinion in endocrinology, diabetes, and obesity* 24, 320-325.  
25 Ong, Z.Y., Alhadeff, A.L., Grill, H.J., 2015. Medial nucleus tractus solitarius oxytocin receptor signaling  
26 and food intake control: the role of gastrointestinal satiation signal processing. *American journal of*  
27 *physiology. Regulatory, integrative and comparative physiology* 308, R800-806.  
28 Ong, Z.Y., Bongiorno, D.M., Hernando, M.A., Grill, H.J., 2017. Effects of Endogenous Oxytocin Receptor  
29 Signaling in Nucleus Tractus Solitarius on Satiation-Mediated Feeding and Thermogenic Control in Male  
30 Rats. *Endocrinology* 158, 2826-2836.  
31 Otero-Garcia, M., Agustin-Pavon, C., Lanuza, E., Martinez-Garcia, F., 2016. Distribution of oxytocin and  
32 co-localization with arginine vasopressin in the brain of mice. *Brain Struct Funct* 221, 3445-3473.  
33 Peris, J., MacFadyen, K., Smith, J.A., de Kloet, A.D., Wang, L., Krause, E.G., 2017. Oxytocin receptors are  
34 expressed on dopamine and glutamate neurons in the mouse ventral tegmental area that project to  
35 nucleus accumbens and other mesolimbic targets. *The Journal of comparative neurology* 525, 1094-  
36 1108.  
37 Petrovich, G.D., Gallagher, M., 2007. Control of food consumption by learned cues: a forebrain-  
38 hypothalamic network. *Physiology & behavior* 91, 397-403.  
39 Popik, P., Van Ree, J.M., 1993. Social transmission of flavored tea preferences: facilitation by a  
40 vasopressin analog and oxytocin. *Behav Neural Biol* 59, 63-68.  
41 Randall, P.A., Pardo, M., Nunes, E.J., Lopez Cruz, L., Vemuri, V.K., Makriyannis, A., Baqi, Y., Muller, C.E.,  
42 Correa, M., Salamone, J.D., 2012. Dopaminergic modulation of effort-related choice behavior as  
43 assessed by a progressive ratio chow feeding choice task: pharmacological studies and the role of  
44 individual differences. *PloS one* 7, e47934.  
45 Rinaman, L., Rothe, E.E., 2002. GLP-1 receptor signaling contributes to anorexigenic effect of centrally  
46 administered oxytocin in rats. *American journal of physiology. Regulatory, integrative and comparative*  
47 *physiology* 283, R99-106.  
48 Ritter, R.C., Slusser, P.G., Stone, S., 1981. Glucoreceptors controlling feeding and blood glucose: location  
49 in the hindbrain. *Science* 213, 451-452.  
50 Rossi, M.A., Stuber, G.D., 2018. Overlapping Brain Circuits for Homeostatic and Hedonic Feeding. *Cell*  
51 *metabolism* 27, 42-56.  
52 Sabatier, N., Leng, G., Menzies, J., 2013. Oxytocin, feeding, and satiety. *Frontiers in endocrinology* 4, 35.  
53  
54  
55  
56  
57  
58  
59  
60  
61  
62  
63  
64  
65

- 1  
2  
3  
4 SanMiguel, N., Pardo, M., Carratala-Ros, C., Lopez-Cruz, L., Salamone, J.D., Correa, M., 2018. Individual  
5 differences in the energizing effects of caffeine on effort-based decision-making tests in rats.  
6 *Pharmacology, biochemistry, and behavior* 169, 27-34.
- 7 Shahrokh, D.K., Zhang, T.Y., Diorio, J., Gratton, A., Meaney, M.J., 2010. Oxytocin-dopamine interactions  
8 mediate variations in maternal behavior in the rat. *Endocrinology* 151, 2276-2286.
- 9 Shamay-Tsoory, S.G., Abu-Akel, A., 2016. The Social Salience Hypothesis of Oxytocin. *Biological*  
10 *psychiatry* 79, 194-202.
- 11 Simon, N.W., Beas, B.S., Montgomery, K.S., Haberman, R.P., Bizon, J.L., Setlow, B., 2013. Prefrontal  
12 cortical-striatal dopamine receptor mRNA expression predicts distinct forms of impulsivity. *The*  
13 *European journal of neuroscience* 37, 1779-1788.
- 14 Spyraiki, C., Fibiger, H.C., Phillips, A.G., 1982. Attenuation by haloperidol of place preference conditioning  
15 using food reinforcement. *Psychopharmacology* 77, 379-382.
- 16 Tellez, L.A., Han, W., Zhang, X., Ferreira, T.L., Perez, I.O., Shammah-Lagnado, S.J., van den Pol, A.N., de  
17 Araujo, I.E., 2016. Separate circuitries encode the hedonic and nutritional values of sugar. *Nature*  
18 *neuroscience* 19, 465-470.
- 19 Walton, M.E., Bannerman, D.M., Rushworth, M.F., 2002. The role of rat medial frontal cortex in effort-  
20 based decision making. *The Journal of neuroscience : the official journal of the Society for Neuroscience*  
21 22, 10996-11003.
- 22 Wassum, K.M., Cely, I.C., Balleine, B.W., Maidment, N.T., 2011a. Micro-opioid receptor activation in the  
23 basolateral amygdala mediates the learning of increases but not decreases in the incentive value of a  
24 food reward. *The Journal of neuroscience : the official journal of the Society for Neuroscience* 31, 1591-  
25 1599.
- 26 Wassum, K.M., Ostlund, S.B., Balleine, B.W., Maidment, N.T., 2011b. Differential dependence of  
27 Pavlovian incentive motivation and instrumental incentive learning processes on dopamine signaling.  
28 *Learn Mem* 18, 475-483.
- 29 Wassum, K.M., Ostlund, S.B., Maidment, N.T., Balleine, B.W., 2009. Distinct opioid circuits determine the  
30 palatability and the desirability of rewarding events. *Proceedings of the National Academy of Sciences of*  
31 *the United States of America* 106, 12512-12517.
- 32 Xiao, L., Priest, M.F., Kozorovitskiy, Y., 2018. Oxytocin functions as a spatiotemporal filter for excitatory  
33 synaptic inputs to VTA dopamine neurons. *eLife* 7.
- 34 Xiao, L., Priest, M.F., Nasenbeny, J., Lu, T., Kozorovitskiy, Y., 2017. Biased Oxytocinergic Modulation of  
35 Midbrain Dopamine Systems. *Neuron* 95, 368-384.e365.
- 36 Yohn, S.E., Errante, E.E., Rosenbloom-Snow, A., Somerville, M., Rowland, M., Tokarski, K., Zafar, N.,  
37 Correa, M., Salamone, J.D., 2016. Blockade of uptake for dopamine, but not norepinephrine or 5-HT,  
38 increases selection of high effort instrumental activity: Implications for treatment of effort-related  
39 motivational symptoms in psychopathology. *Neuropharmacology* 109, 270-280.
- 40 Yosten, G.L., Samson, W.K., 2010. The anorexigenic and hypertensive effects of nesfatin-1 are reversed  
41 by pretreatment with an oxytocin receptor antagonist. *American journal of physiology. Regulatory,*  
42 *integrative and comparative physiology* 298, R1642-1647.
- 43 Zhou, Y., Zhu, H., Liu, Z., Chen, X., Su, X., Ma, C., Tian, Z., Huang, B., Yan, E., Liu, X., Ma, L., 2019. A ventral  
44 CA1 to nucleus accumbens core engram circuit mediates conditioned place preference for cocaine.  
45 *Nature neuroscience* 22, 1986-1999.
- 46  
47  
48  
49  
50  
51  
52  
53  
54  
55  
56  
57  
58  
59  
60  
61  
62  
63  
64  
65

**Figure 1**

bioRxiv preprint doi: <https://doi.org/10.1101/2020.06.24.169540>; this version posted June 24, 2020. The copyright holder for this preprint (which was not certified by peer review) is the author/funder, who has granted bioRxiv a license to display the preprint in perpetuity. It is made available under aCC-BY-NC-ND 4.0 International license.

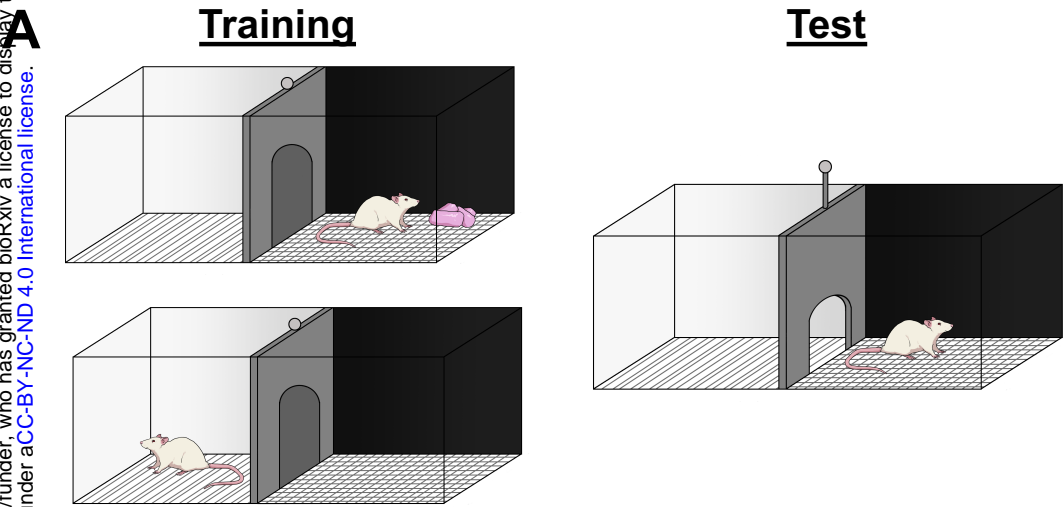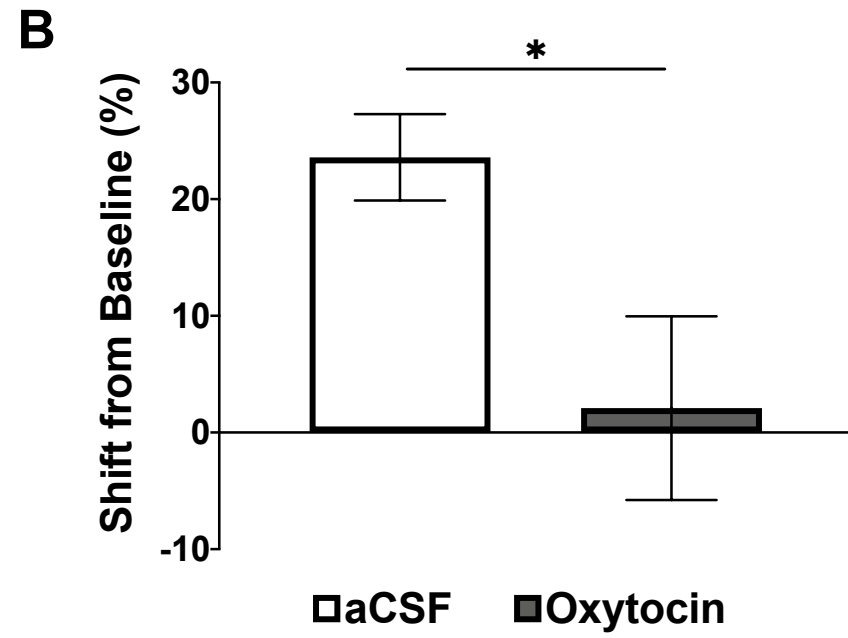

## Figure 2

### A

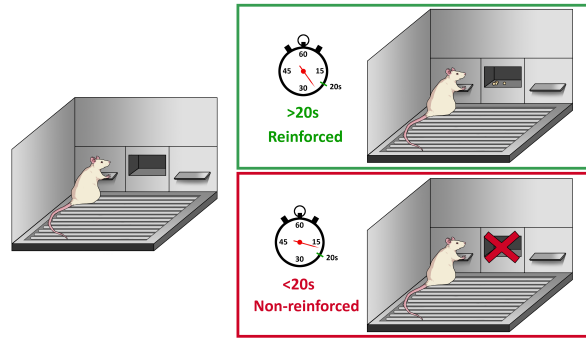

### B

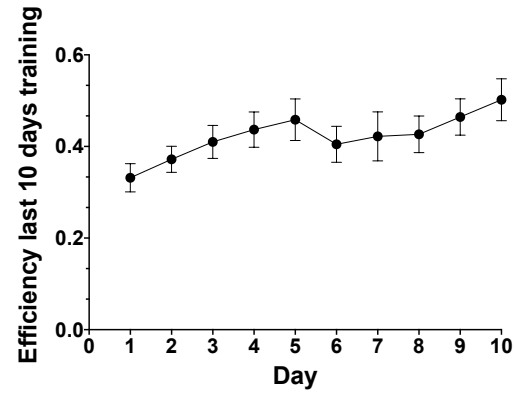

### C

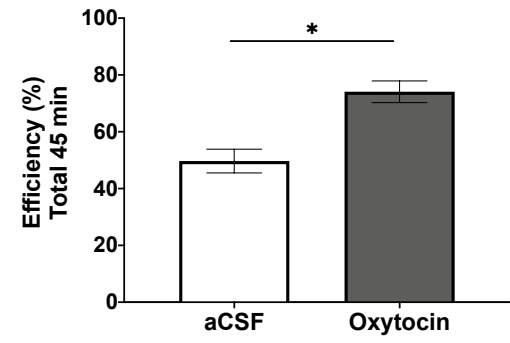

### D

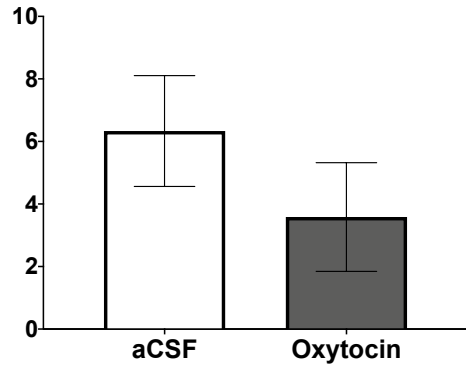

### E

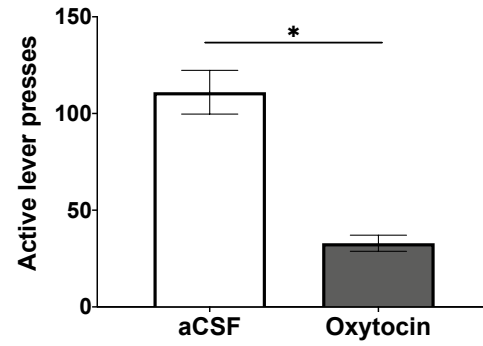

### F

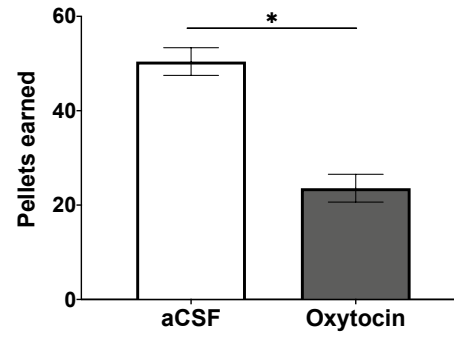

### G

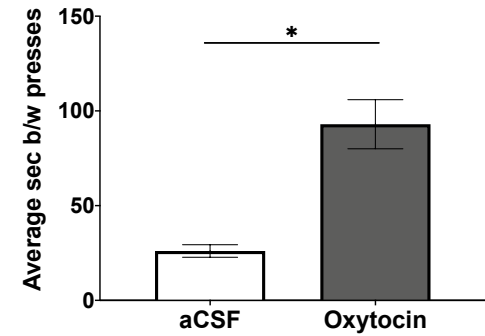

### H

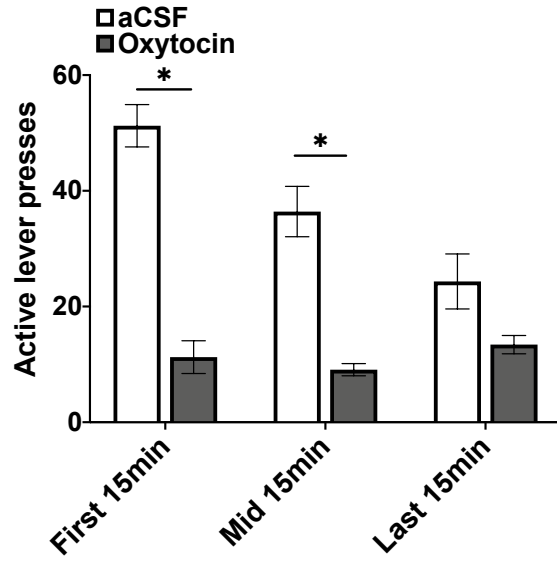

### I

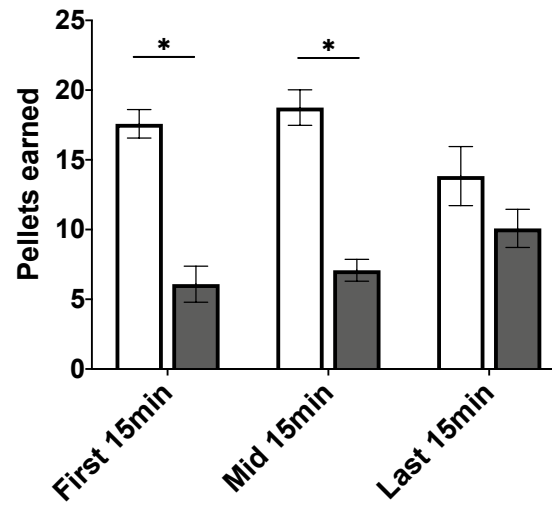

### J

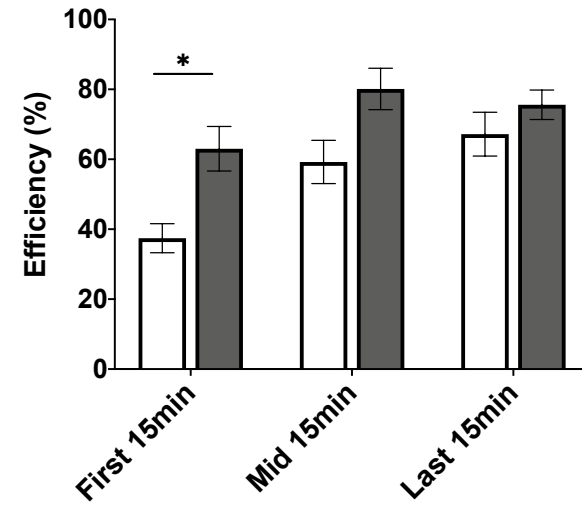

Figure 3

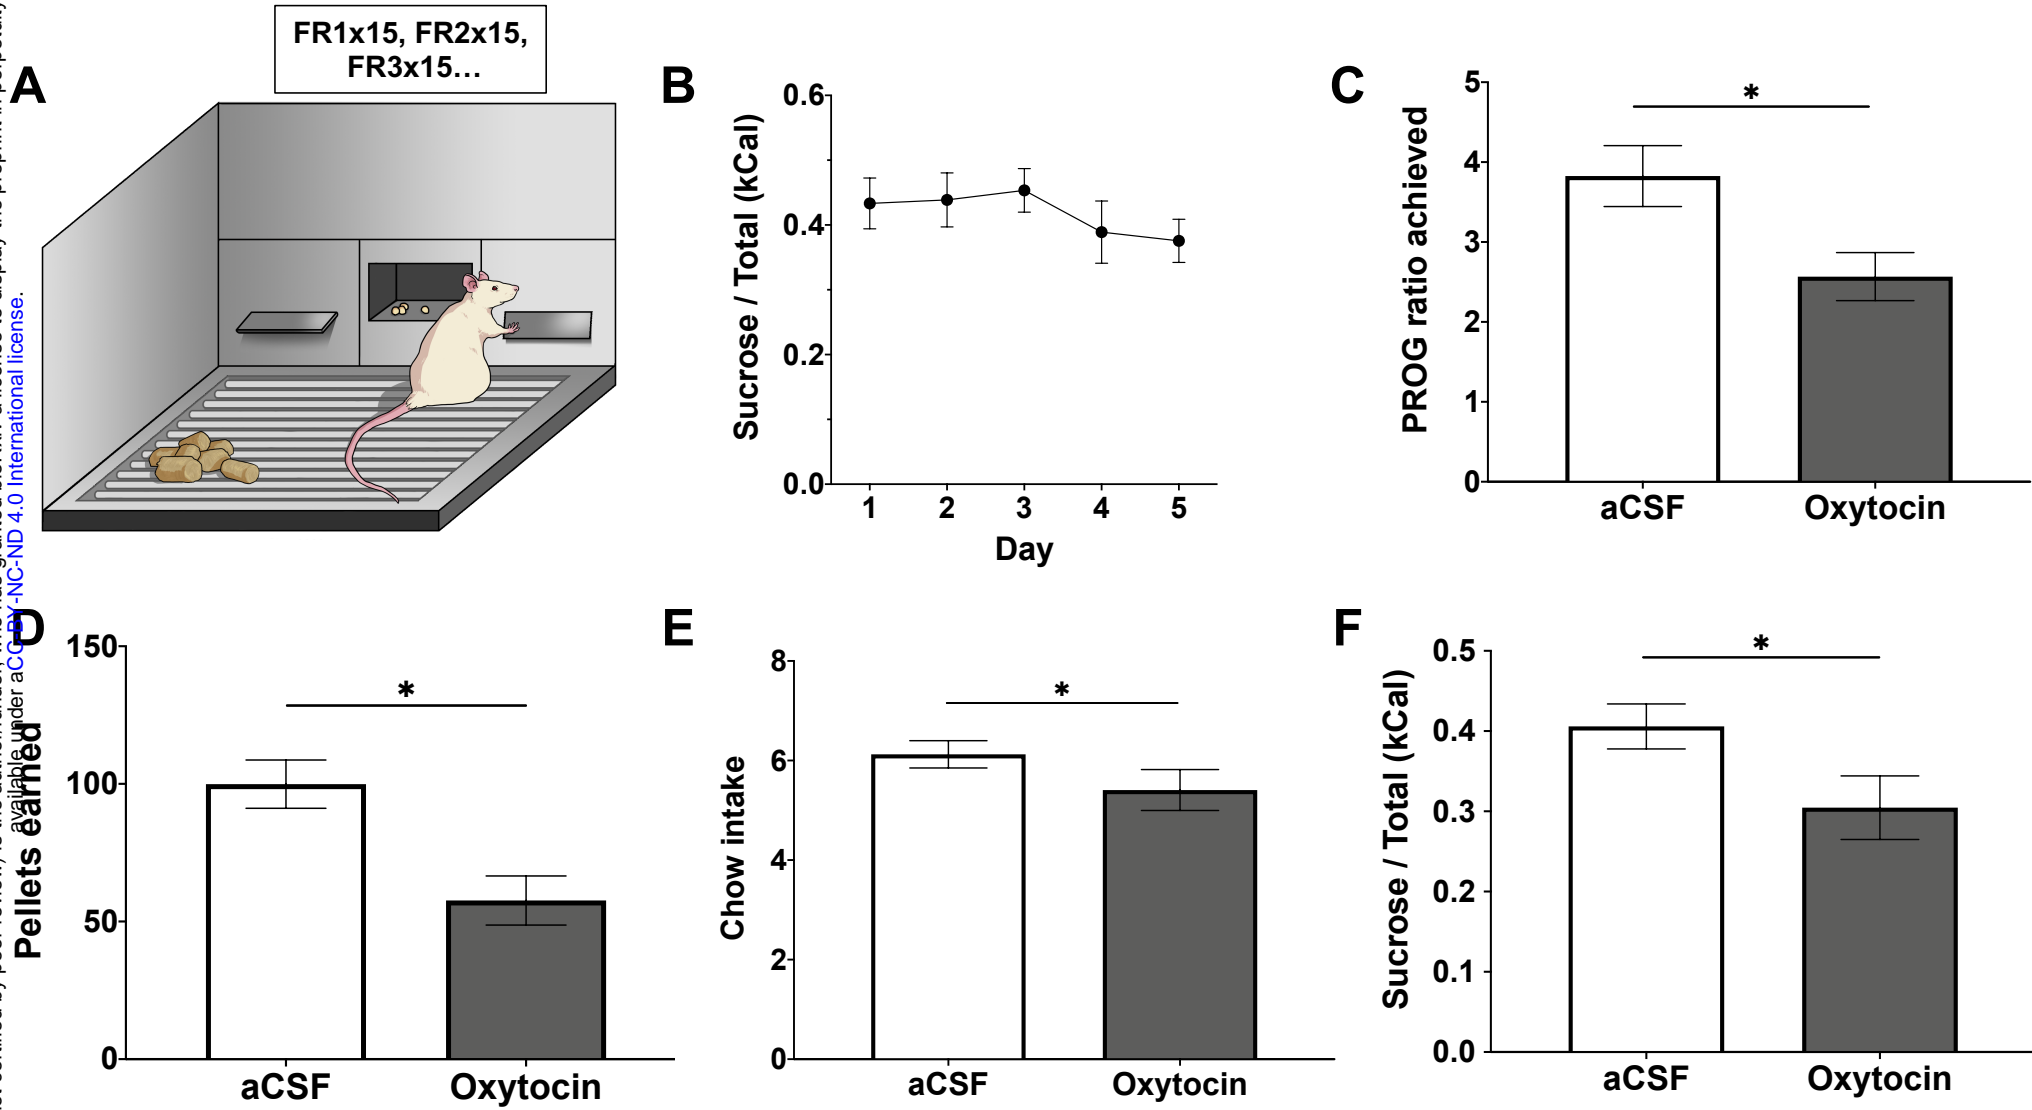

**Figure 4**

bioRxiv preprint doi: <https://doi.org/10.1101/2020.06.24.169540>; this version posted June 24, 2020. The copyright holder for this preprint (which was not certified by peer review) is the author/funder, who has granted bioRxiv a license to display the preprint in perpetuity. It is made available under aCC-BY-NC-ND 4.0 International license.

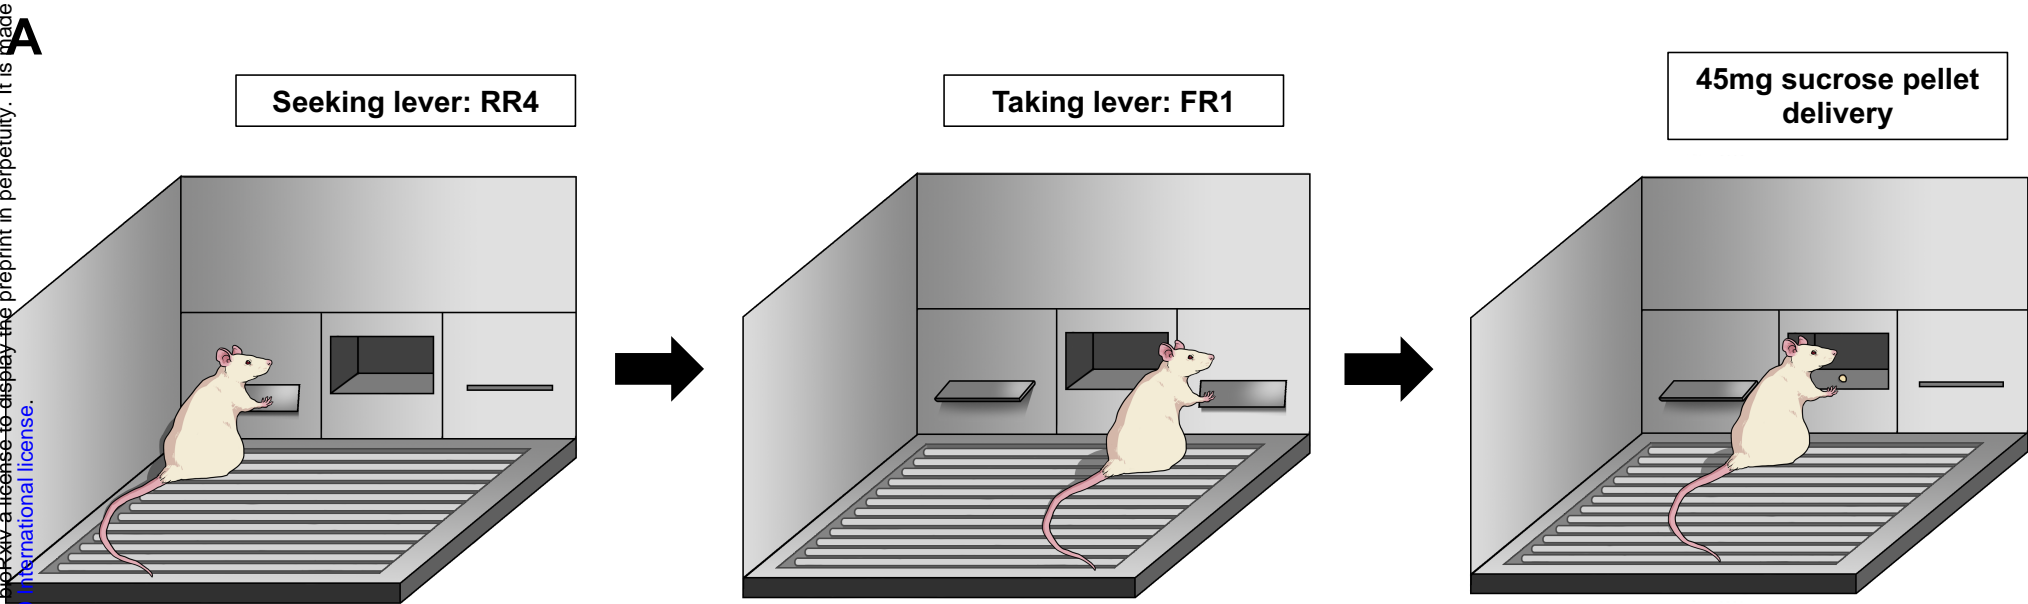

**B**

| Group        | Train | Exposure state | Exposure drug | Test state     |
|--------------|-------|----------------|---------------|----------------|
| Sated aCSF   | Sated | Sated          | aCSF          | 24 hr food dep |
| Dep aCSF     | Sated | 24 hr food dep | aCSF          | 24 hr food dep |
| Dep Oxytocin | Sated | 24 hr food dep | Oxytocin      | 24 hr food dep |

**C**

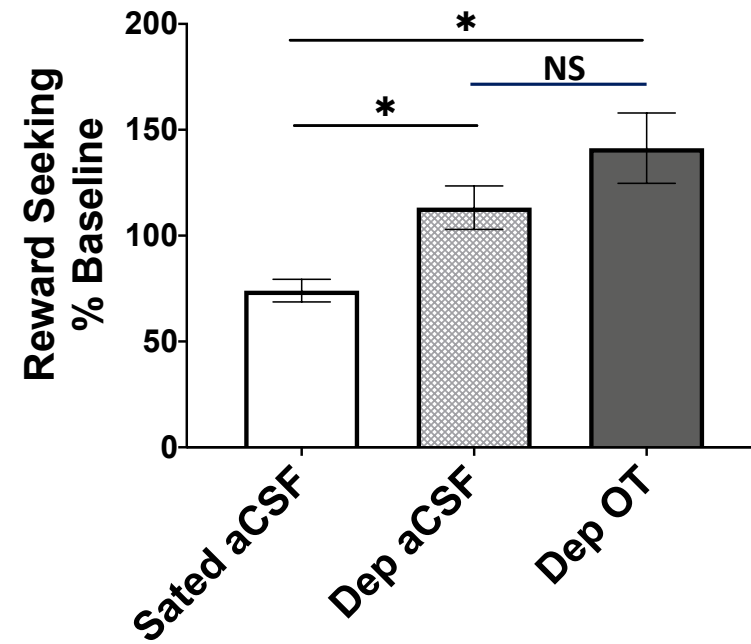



**Figure 5**

bioRxiv preprint doi: <https://doi.org/10.1101/2020.06.24.169540>; this version posted June 24, 2020. The copyright holder for this preprint (which was not certified by peer review) is the author/funder, who has granted bioRxiv a license to display the preprint in perpetuity. It is made available under aCC-BY-NC-ND 4.0 International license.

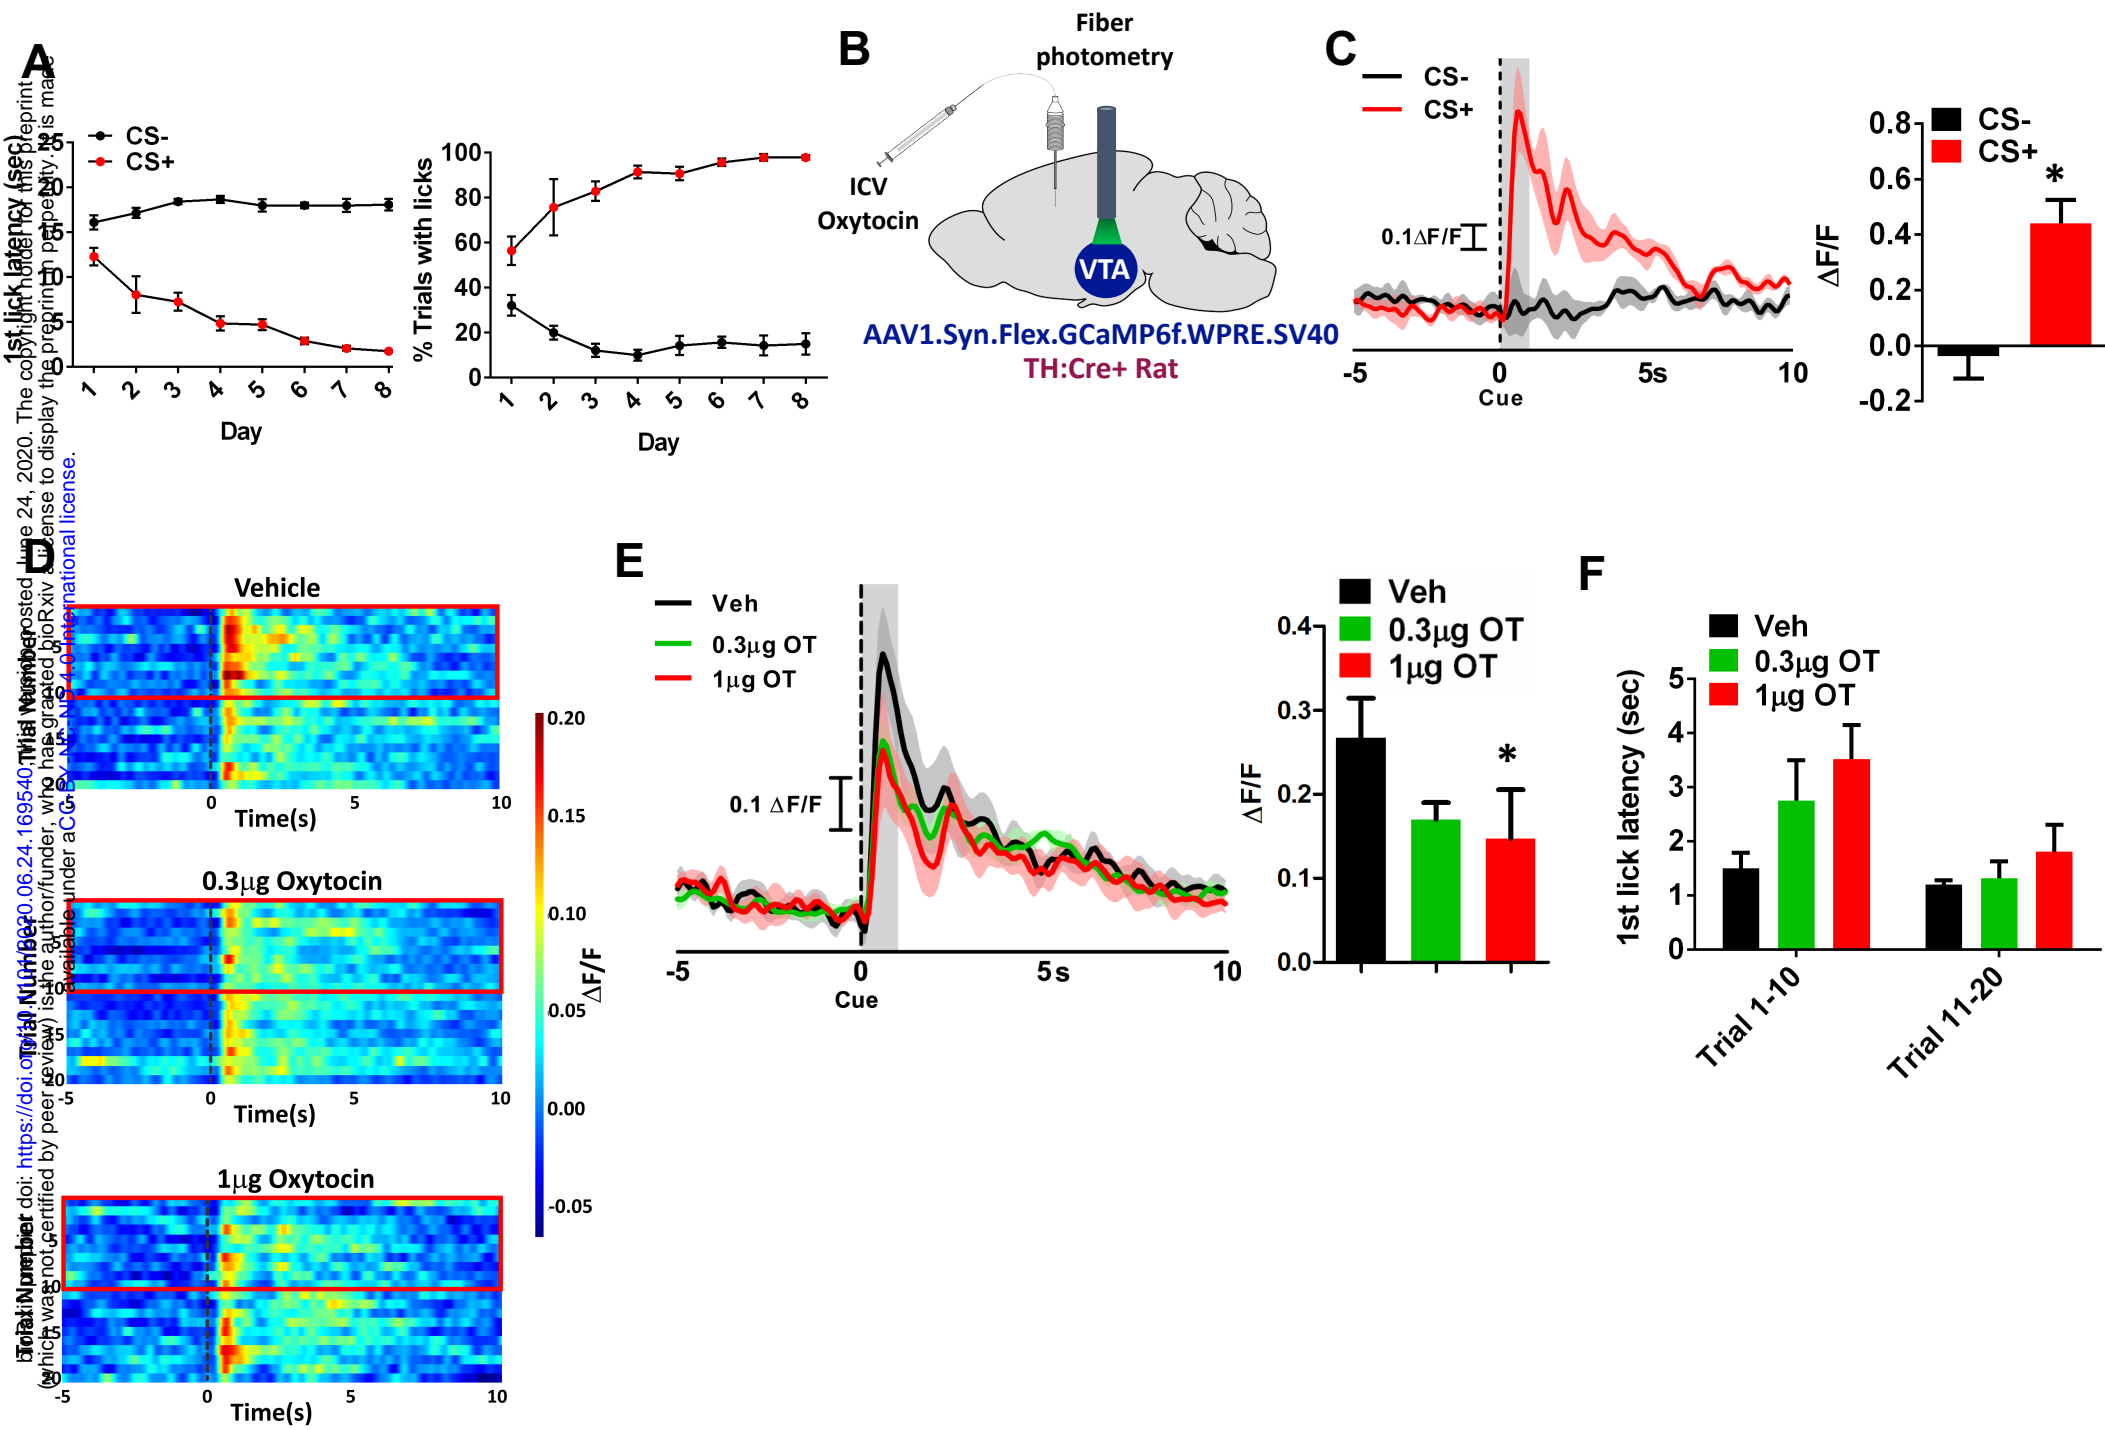

Source: https://www.biorxiv.org/content/10.1101/2020.06.24.169540v1.full.pdf
